# Supplementary material for: A human gut microbial gene catalogue established by metagenomic sequencing
Source: Springer Nature journal article supplement (doi:10.1038/nature08821), 2010-03-01
Supplement: 41586_2010_BFnature08821_MOESM332_ESM.pdf [file 41586_2010_BFnature08821_MOESM332_ESM.pdf]

## Supplementary Figures

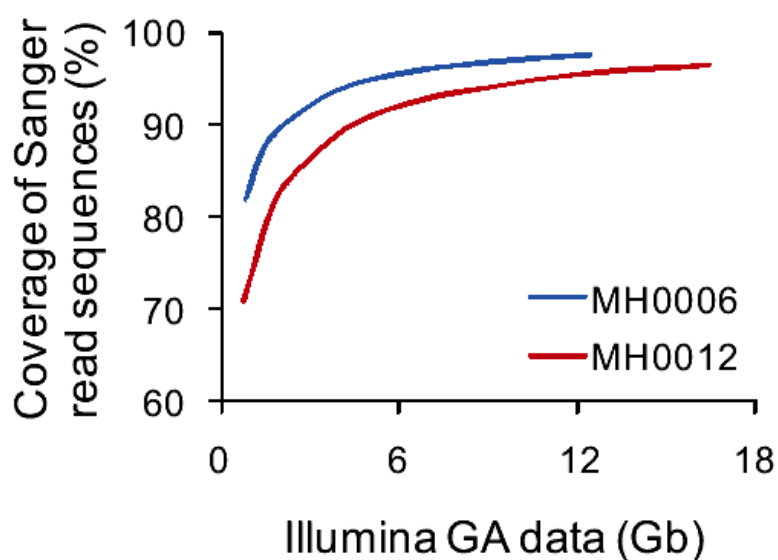

**Figure 1 | Coverage of Sanger sequencing reads by Illumina GA reads.** Two DNA samples were analyzed by both Sanger and Illumina sequencing. The Illumina GA reads were aligned against the Sanger reads using SOAP. The 50 bp region at the end of the Sanger reads was not taken into account since they may have relatively lower sequence quality and are less likely to be mapped by Illumina GA reads. Subset of Illumina GA reads were extracted from the whole dataset randomly to calculate the coverage of the Sanger read sequence at a given Illumina GA sequencing depth.

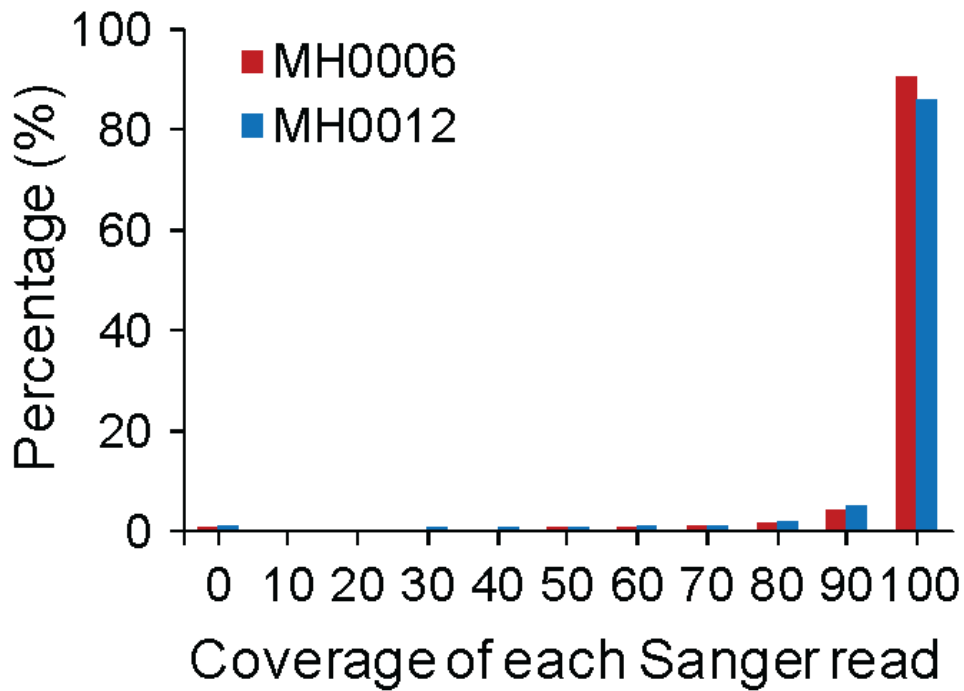

**Figure 2 | Distribution of Illumina GA sequencing read coverage of each Sanger read.** The Illumina GA reads were aligned against the Sanger reads using SOAP, the coverage of each Sanger read was calculated and the percentage in each coverage interval was determined.

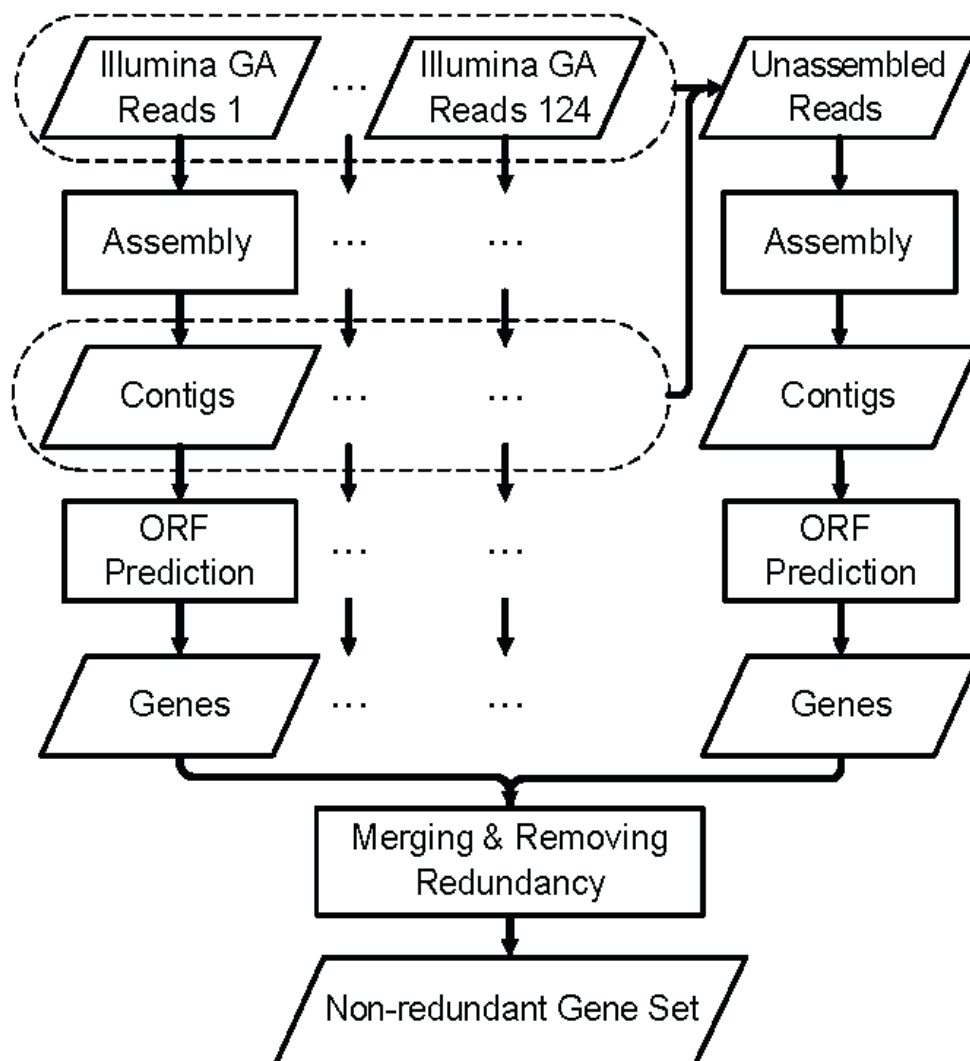

**Figure 3 | Flowchart of human gut microbiome data analysis process.** We performed *de novo* short reads assembly for each sample independently, then all the unassembled reads were pooled for another round of assembly. ORFs were predicted in each of the contig set, and were merged by removing redundancy. The non-redundant gene set was used in all further analysis.

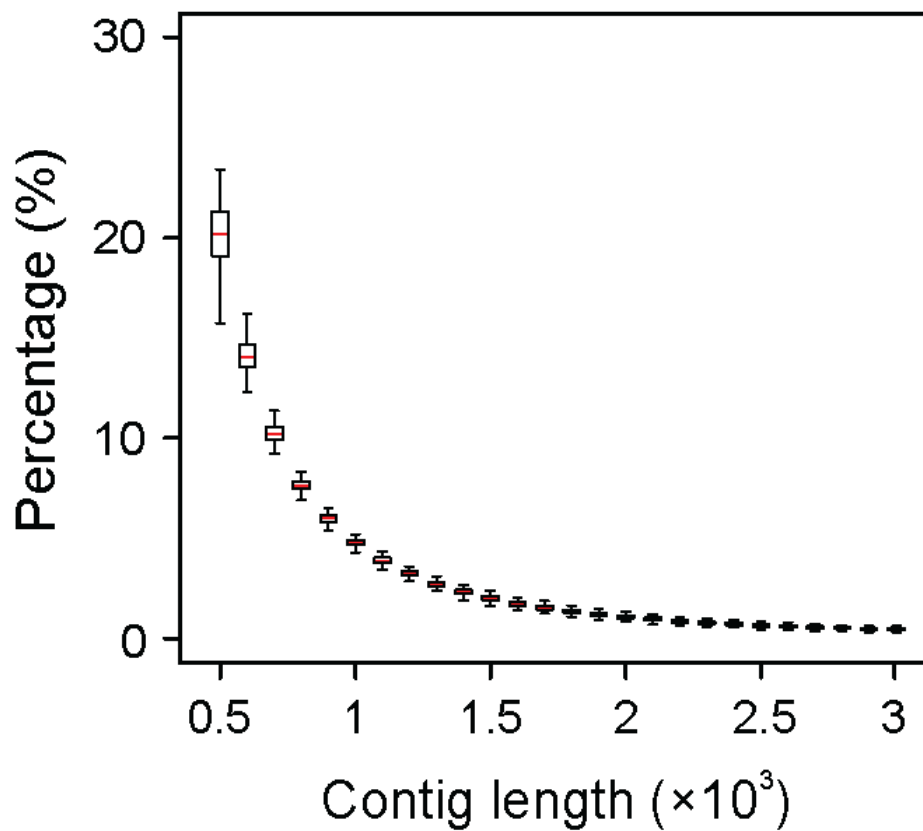

**Figure 4 | Length distribution of assembled contigs.** The number of contigs in different length bins for each individual was computed, and the data from all 124 individuals were pooled. Boxes denote 25% and 75% percentiles, the red line corresponds to the median, and the “whiskers” indicate interquartile range from either or both ends of the box

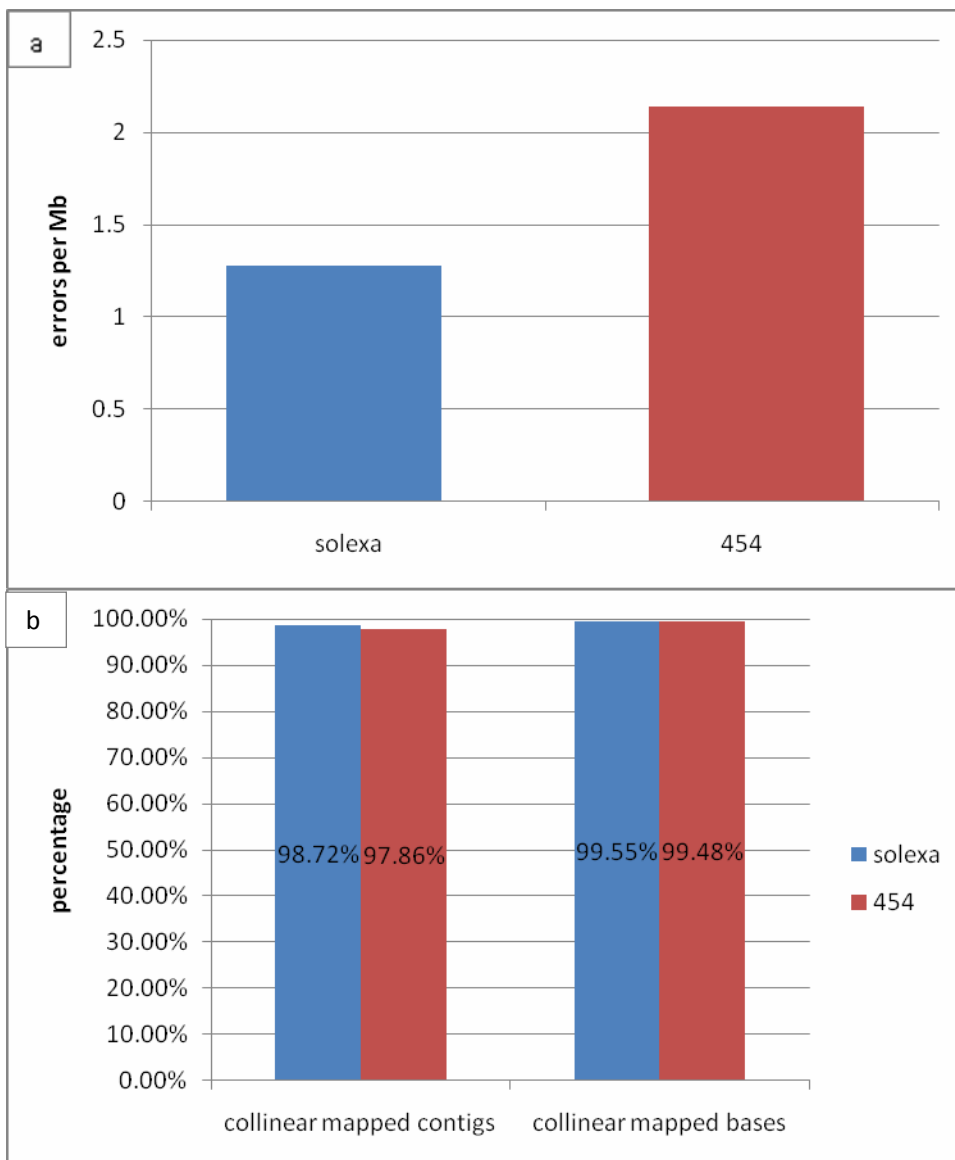

**Figure 5 | Validating Illumina contigs using Sanger reads.** Illumina/454 contigs from samples MH0006 and MH0012 were mapped to Sanger reads from the same samples. Aligned regions were scanned for breakage of collinearity, and each unique break is counted as an error. a. number of errors per Mb of Illumina/454 contigs mapped to Sanger reads. b. percentage of collinear Illumina/454 contigs and collinear basepairs in those contigs.

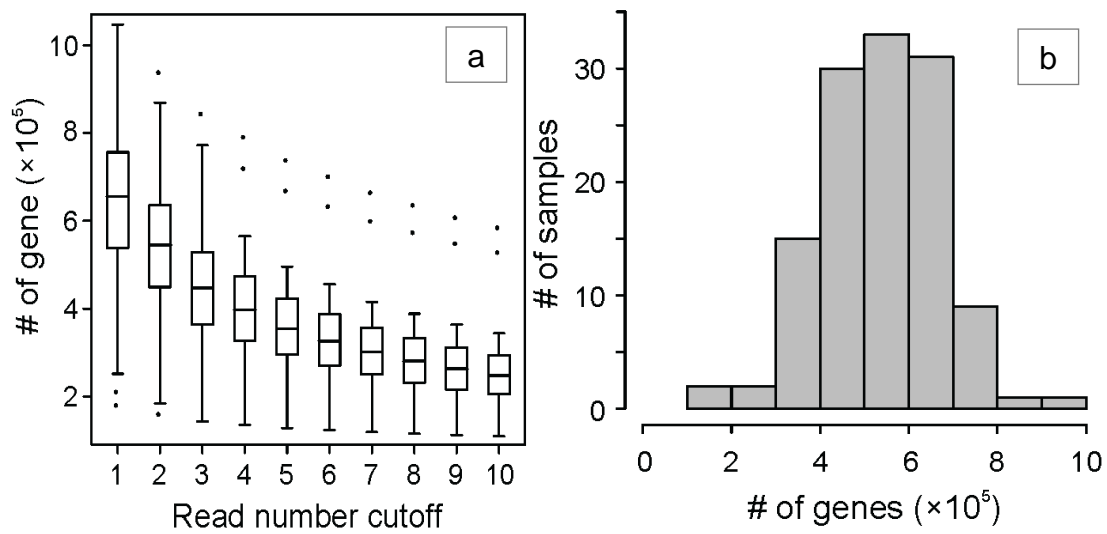

**Figure 6 | a, Number of unique genes identified by read number cutoffs.** At each cutoff, the minimum, median, and maximum number of genes identified over all the 124 samples are shown. **b, Histogram of number of unique genes in different samples.** Short reads were aligned on the non-redundant gene set, and at least 2 matched reads were required to define a gene's presence in the sample.

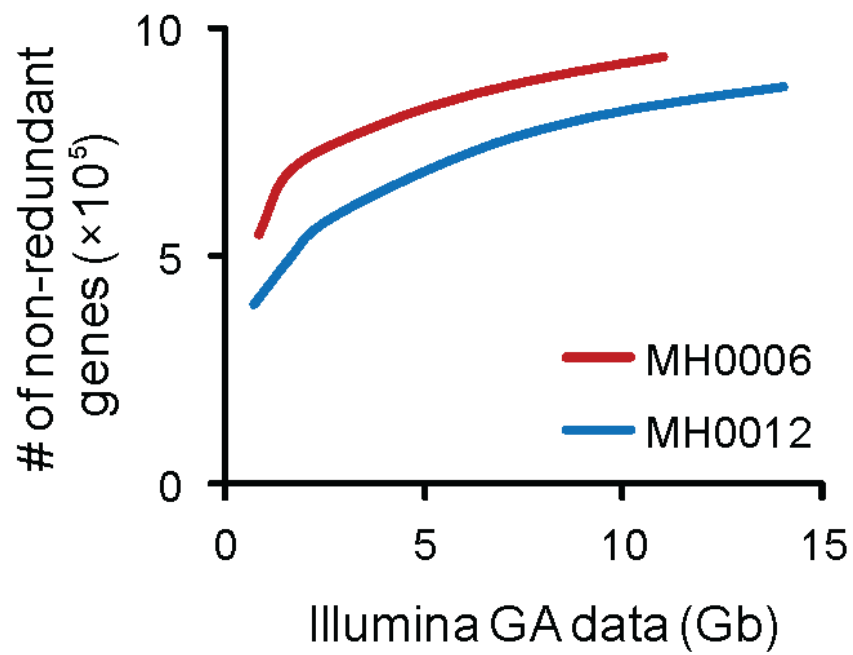

**Figure 7 |** Number of unique genes identified with increase of sequencing depth in sample MH0006 and MH0012.

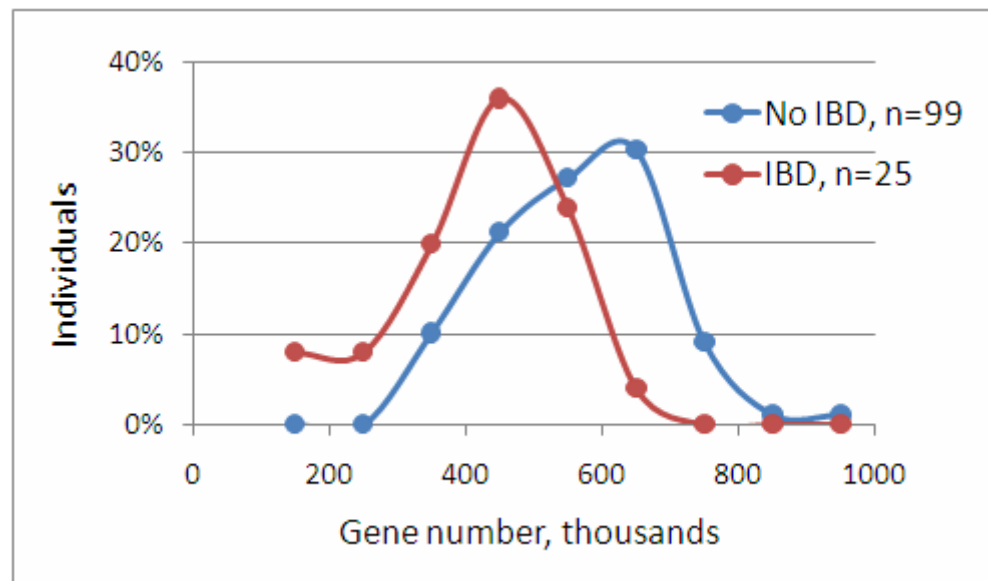

**Figure 8 | Distribution of nonredundant bacterial genes in IBD patients and healthy controls.** The proportion of individuals having a given number of genes (classes of 100 thousand genes were used) is shown. The average gene number for IBD patients and individuals not suffering from IBD was  $425,397 \pm 126,685$  (s.d.;  $n=25$ ) and  $564,070 \pm 121,962$  (s.d.;  $n=99$ ), respectively;  $p < 10^{-6}$  (one-tailed Student t test).



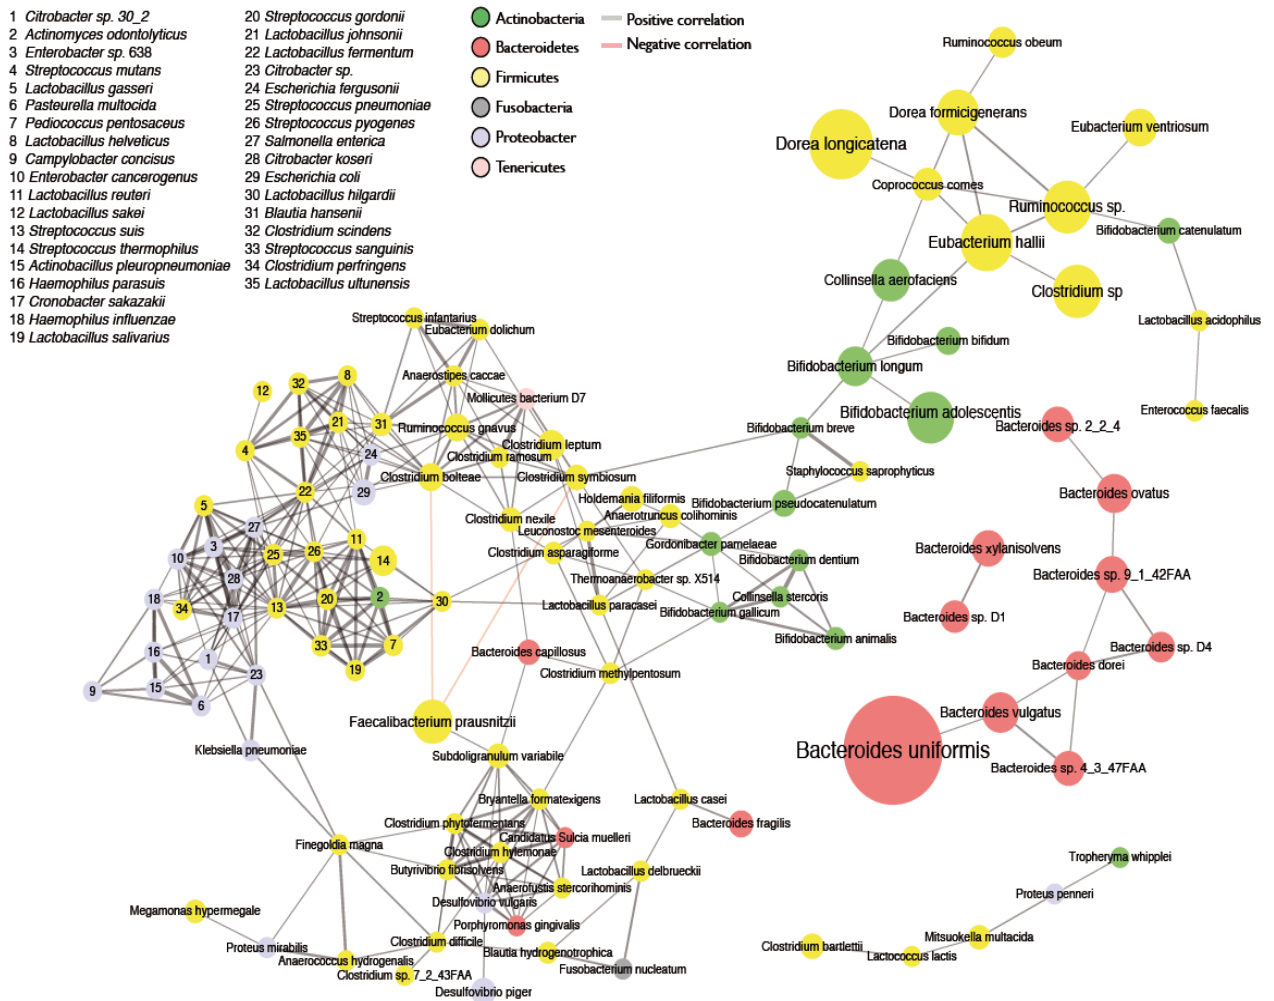

**Figure 9 | Relations between the most abundant bacterial species.** The network was deduced from the analysis of 155 bacterial species present in at least 1 individual at a genome coverage of  $\geq 1\%$ . Size of the nodes (circles) indicates species abundance over the cohort, width of the edges (lines connecting the circles) indicates the value of the Pearson correlation coefficient (only the 342 values above 0.4 or below -0.4 out of a total of 11,935 were used for the network).

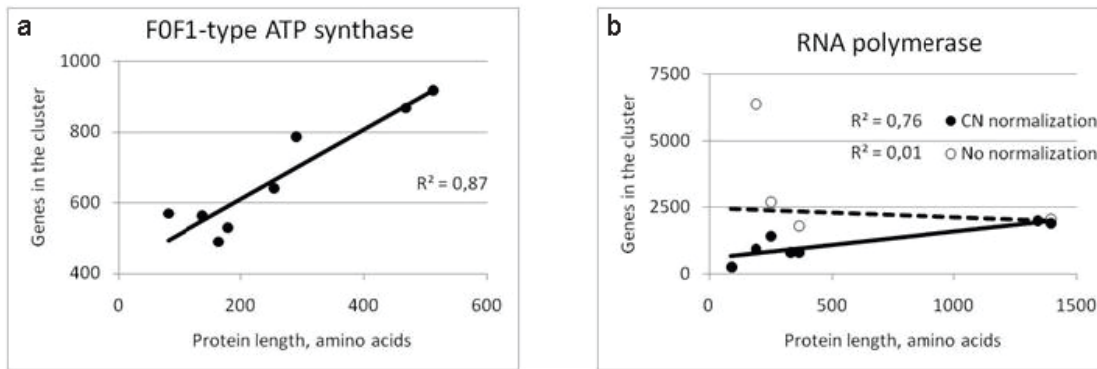

**Figure 10 | a, The number of genes assigned to different clusters is correlated with the protein length. b, The effect of copy number (CN) normalization to a single copy is illustrated for RNA polymerase.** Protein length is the median of the proteins in the bacterial genomes used to compose eggNOG clusters, the CN is the average number of a function in a genome that encodes it.

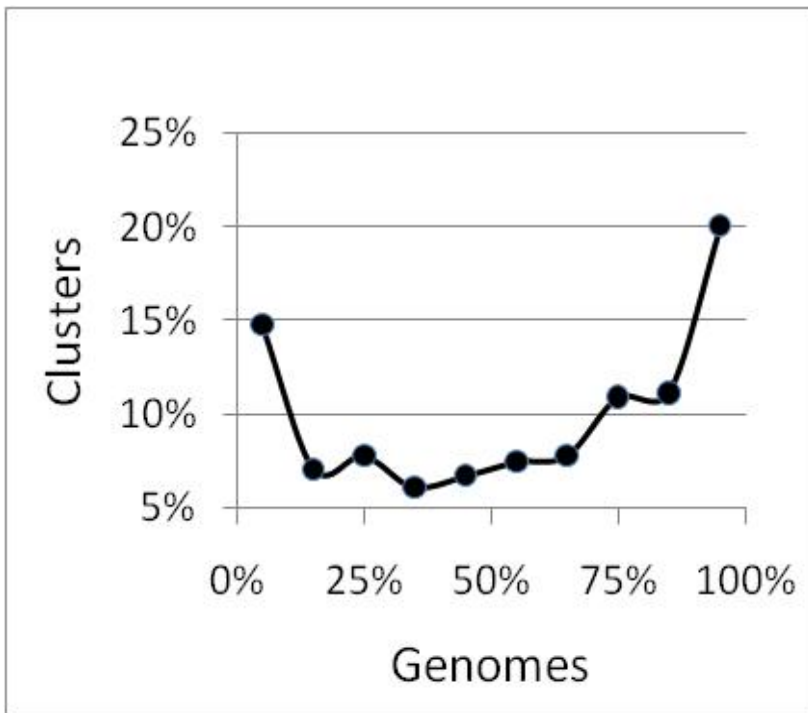

Figure 11 | Distribution of the range clusters across the eggNOG genomes.

## Supplementary Tables

**Table 1 | DNA sample information.**

All Danish individuals in the present subsample were originally recruited from a larger population-based sample of middle-aged people living in the northern part of Copenhagen region and sampled from the centralized personal number register. At the original recruitment the individuals included in the present study had normal fasting plasma glucose and normal 2 hour plasma glucose following an oral glucose tolerance test. At the time of fecal sampling all were examined in the fasting state and had non-diabetic fasting plasma glucose levels below 7,0 mmol/l. All of the IBD patients were in clinical remission at the time of fecal sampling. N refers to no IBD, CD & UC to Crohn's disease and ulcerative colitis, respectively.

| Sample Name | Country | Gender | Age | BMI   | IBD |
|-------------|---------|--------|-----|-------|-----|
| MH0001      | Denmark | female | 49  | 25.55 | N   |
| MH0002      | Denmark | female | 59  | 27.28 | N   |
| MH0003      | Denmark | male   | 69  | 33.19 | N   |
| MH0004      | Denmark | male   | 59  | 31.18 | N   |
| MH0005      | Denmark | male   | 64  | 21.68 | N   |
| MH0006      | Denmark | female | 59  | 22.38 | N   |
| MH0007      | Denmark | male   | 69  | 33.60 | N   |
| MH0008      | Denmark | male   | 59  | 24.35 | N   |
| MH0009      | Denmark | male   | 64  | 29.04 | N   |
| MH0010      | Denmark | male   | 64  | 33.27 | N   |
| MH0011      | Denmark | female | 0   | 22.31 | N   |
| MH0012      | Denmark | female | 42  | 32.10 | N   |
| MH0013      | Denmark | male   | 54  | 20.46 | N   |
| MH0014      | Denmark | female | 54  | 38.49 | N   |
| MH0015      | Denmark | male   | 59  | 25.47 | N   |
| MH0016      | Denmark | female | 49  | 30.50 | N   |
| MH0017      | Denmark | male   | 64  | 21.81 | N   |
| MH0018      | Denmark | male   | 49  | 31.37 | N   |
| MH0019      | Denmark | female | 44  | 20.01 | N   |
| MH0020      | Denmark | female | 63  | 33.23 | N   |
| MH0021      | Denmark | female | 49  | 25.42 | N   |
| MH0022      | Denmark | male   | 64  | 24.42 | N   |
| MH0023      | Denmark | male   | 69  | 31.74 | N   |
| MH0024      | Denmark | female | 59  | 22.72 | N   |
| MH0025      | Denmark | female | 49  | 34.20 | N   |
| MH0026      | Denmark | female | 49  | 37.32 | N   |
| MH0027      | Denmark | female | 59  | 23.07 | N   |
| MH0028      | Denmark | female | 44  | 22.70 | N   |
| MH0030      | Denmark | male   | 59  | 35.21 | N   |
| MH0031      | Denmark | male   | 69  | 22.34 | N   |
| MH0032      | Denmark | male   | 69  | 35.28 | N   |
| MH0033      | Denmark | female | 59  | 31.95 | N   |

|        |         |        |    |       |   |
|--------|---------|--------|----|-------|---|
| MH0034 | Denmark | male   | 54 | 39.97 | N |
| MH0035 | Denmark | male   | 49 | 22.66 | N |
| MH0036 | Denmark | male   | 64 | 30.74 | N |
| MH0037 | Denmark | male   | 44 | 24.02 | N |
| MH0038 | Denmark | female | 54 | 21.97 | N |
| MH0039 | Denmark | male   | 58 | 23.07 | N |
| MH0040 | Denmark | female | 67 | 20.87 | N |
| MH0041 | Denmark | male   | 59 | 23.17 | N |
| MH0042 | Denmark | male   | 49 | 24.46 | N |
| MH0043 | Denmark | male   | 69 | 23.72 | N |
| MH0044 | Denmark | male   | 64 | 24.48 | N |
| MH0045 | Denmark | male   | 59 | 25.11 | N |
| MH0046 | Denmark | male   | 54 | 23.74 | N |
| MH0047 | Denmark | female | 69 | 30.40 | N |
| MH0048 | Denmark | female | 54 | 19.40 | N |
| MH0049 | Denmark | female | 44 | 35.52 | N |
| MH0050 | Denmark | male   | 49 | 25.08 | N |
| MH0051 | Denmark | female | 69 | 23.15 | N |
| MH0052 | Denmark | female | 49 | 33.18 | N |
| MH0053 | Denmark | female | 49 | 32.70 | N |
| MH0054 | Denmark | male   | 49 | 20.31 | N |
| MH0055 | Denmark | male   | 59 | 30.29 | N |
| MH0056 | Denmark | male   | 54 | 25.35 | N |
| MH0057 | Denmark | female | 54 | 32.98 | N |
| MH0058 | Denmark | female | 54 | 22.04 | N |
| MH0059 | Denmark | male   | 59 | 33.27 | N |
| MH0060 | Denmark | male   | 54 | 23.52 | N |
| MH0061 | Denmark | female | 69 | 30.12 | N |
| MH0062 | Denmark | female | 49 | 37.54 | N |
| MH0063 | Denmark | male   | 59 | 30.23 | N |
| MH0064 | Denmark | female | 54 | 23.18 | N |
| MH0065 | Denmark | male   | 59 | 28.23 | N |
| MH0066 | Denmark | female | 44 | 20.79 | N |
| MH0067 | Denmark | male   | 54 | 21.07 | N |
| MH0068 | Denmark | female | 54 | 28.97 | N |
| MH0069 | Denmark | female | 59 | 36.71 | N |
| MH0070 | Denmark | male   | 49 | 22.69 | N |
| MH0071 | Denmark | female | 44 | 25.37 | N |
| MH0072 | Denmark | female | 64 | 40.21 | N |
| MH0073 | Denmark | male   | 54 | 32.49 | N |
| MH0074 | Denmark | female | 49 | 20.46 | N |
| MH0075 | Denmark | male   | 64 | 30.55 | N |
| MH0076 | Denmark | female | 69 | 34.78 | N |
| MH0077 | Denmark | female | 49 | 24.92 | N |
| MH0078 | Denmark | female | 49 | 36.90 | N |
| MH0079 | Denmark | female | 64 | 19.97 | N |
| MH0080 | Denmark | female | 59 | 18.59 | N |
| MH0081 | Denmark | female | 49 | 37.95 | N |
| MH0082 | Denmark | female | 59 | 22.56 | N |
| MH0083 | Denmark | female | 54 | 30.59 | N |

|          |         |        |    |       |   |
|----------|---------|--------|----|-------|---|
| MH0084   | Denmark | male   | 64 | 31.67 | N |
| MH0085   | Denmark | female | 59 | 36.46 | N |
| MH0086   | Denmark | female | 59 | 21.59 | N |
| O2.UC-1  | Spain   | male   | 37 | 31.02 | Y |
| O2.UC-11 | Spain   | female | 34 | 18.68 | Y |
| O2.UC-12 | Spain   | male   | 43 | 21.60 | Y |
| O2.UC-13 | Spain   | female | 68 | 23.38 | Y |
| O2.UC-14 | Spain   | male   | 31 | 32.65 | Y |
| O2.UC-16 | Spain   | male   | 47 | 26.42 | Y |
| O2.UC-17 | Spain   | male   | 56 | 21.87 | Y |
| O2.UC-18 | Spain   | male   | 48 | 25.72 | Y |
| O2.UC-19 | Spain   | male   | 42 | 24.15 | Y |
| O2.UC-20 | Spain   | female | 51 | 24.03 | Y |
| O2.UC-21 | Spain   | female | 49 | 30.46 | Y |
| O2.UC-22 | Spain   | male   | 44 | 25.39 | Y |
| O2.UC-23 | Spain   | female | 44 | 28.16 | Y |
| O2.UC-24 | Spain   | female | 55 | 28.76 | Y |
| O2.UC-4  | Spain   | female | 57 | 28.53 | Y |
| V1.CD-1  | Spain   | female | 25 | 17.93 | Y |
| V1.CD-11 | Spain   | female | 62 | 35.46 | N |
| V1.CD-12 | Spain   | female | 41 | 20.20 | Y |
| V1.CD-13 | Spain   | male   | 68 | 25.69 | N |
| V1.CD-14 | Spain   | female | 41 | 23.12 | N |
| V1.CD-15 | Spain   | female | 34 | 19.00 | Y |
| V1.CD-2  | Spain   | male   | 49 | 27.76 | N |
| V1.CD-3  | Spain   | female | 18 | 21.51 | N |
| V1.CD-4  | Spain   | female | 46 | 29.69 | N |
| V1.CD-6  | Spain   | female | 36 | 18.52 | Y |
| V1.CD-8  | Spain   | male   | 51 | 29.38 | N |
| V1.CD-9  | Spain   | female | 48 | 27.55 | N |
| V1.UC-10 | Spain   | male   | 45 | 27.31 | Y |
| V1.UC-13 | Spain   | female | 51 | 28.51 | Y |
| V1.UC-14 | Spain   | female | 53 | 20.25 | Y |
| V1.UC-15 | Spain   | female | 25 | 22.77 | Y |
| V1.UC-17 | Spain   | female | 41 | 24.46 | Y |
| V1.UC-18 | Spain   | female | 63 | 28.67 | N |
| V1.UC-19 | Spain   | female | 37 | 21.19 | N |
| V1.UC-21 | Spain   | male   | 62 | 25.21 | Y |
| V1.UC-6  | Spain   | female | 38 | 23.18 | N |
| V1.UC-7  | Spain   | female | 19 | 23.05 | N |
| V1.UC-8  | Spain   | male   | 22 | 25.40 | N |
| V1.UC-9  | Spain   | male   | 32 | 30.37 | N |

**Table 2 | Summary of Sanger reads.** The reads were sequenced by 3730xl. Low-quality sequences at both ends with phred score less than 20 were trimmed. Very short reads with length less than 100 bp were filtered.

| <b>Sample ID</b> | <b># Sanger reads</b> | <b>Average length (bp)</b> | <b>Total length (bp)</b> |
|------------------|-----------------------|----------------------------|--------------------------|
| MH0006           | 237,567               | 660.65                     | 156,949,306              |
| MH0012           | 230,768               | 670.26                     | 154,675,458              |

**Table 3 | Summary of Illumina GA reads.** We constructed libraries with three different insert sizes of about 135 bp, 200 bp, and 400 bp. The insert sizes of each library were estimated by re-aligning the paired-end reads on the assembled contigs.

| Sample ID | Paired-end insert size (bp) | Read length (bp) | # of reads | Data (Gb) | human reads, % | # of high quality reads |
|-----------|-----------------------------|------------------|------------|-----------|----------------|-------------------------|
| MH0047    | 136/378                     | 75               | 35,355,400 | 2.65      | 0.18           | 26,932,064              |
| MH0021    | 134/354                     | 75               | 36,454,400 | 2.73      | 0.12           | 26,258,326              |
| MH0079    | 135/360                     | 75               | 38,011,600 | 2.85      | 0.40           | 27,418,899              |
| MH0078    | 146/373                     | 75               | 38,038,200 | 2.85      | 1.56           | 26,051,537              |
| MH0052    | 141/367                     | 75               | 39,538,000 | 2.97      | 0.08           | 28,575,036              |
| MH0049    | 134/343                     | 75               | 40,444,200 | 3.03      | 0.06           | 30,654,842              |
| MH0076    | 134/409                     | 75               | 40,697,000 | 3.05      | 0.42           | 30,650,106              |
| MH0051    | 143/374                     | 75               | 41,911,800 | 3.14      | 0.32           | 25,963,104              |
| MH0048    | 143/349                     | 75               | 42,923,600 | 3.22      | 0.26           | 26,972,970              |
| O2.UC-14  | 141/355                     | 75               | 43,343,000 | 3.25      | 0.06           | 26,942,750              |
| MH0015    | 235                         | 44               | 44,671,400 | 1.97      | 0.04           | 33,014,675              |
| MH0018    | 233                         | 44               | 45,081,400 | 1.98      | 2.14           | 36,609,695              |
| MH0027    | 238                         | 44               | 45,190,000 | 1.99      | 0.09           | 32,377,390              |
| MH0017    | 223                         | 44               | 45,557,200 | 2.00      | 0.04           | 36,154,362              |
| MH0022    | 256                         | 44               | 46,415,000 | 2.04      | 0.21           | 37,112,508              |
| MH0023    | 237                         | 44               | 48,598,400 | 2.14      | 0.04           | 37,782,998              |
| MH0019    | 249                         | 44               | 49,229,400 | 2.17      | 0.06           | 38,856,780              |
| MH0026    | 156/398                     | 75               | 49,812,000 | 3.74      | 0.05           | 37,484,066              |
| MH0013    | 238                         | 44               | 50,257,200 | 2.21      | 1.63           | 40,028,120              |
| MH0005    | 237                         | 44               | 50,704,800 | 2.23      | 0.23           | 39,407,333              |
| MH0007    | 195                         | 44               | 50,719,800 | 2.23      | 0.31           | 36,956,284              |
| MH0008    | 219                         | 44               | 51,411,000 | 2.26      | 0.10           | 38,156,496              |
| V1.UC-7   | 141/356                     | 75               | 51,911,400 | 3.89      | 14.67          | 36,788,540              |
| MH0010    | 220                         | 44               | 52,218,200 | 2.30      | 0.08           | 39,169,850              |
| V1.CD-12  | 148/361                     | 75               | 53,519,400 | 4.01      | 0.02           | 40,609,134              |
| O2.UC-20  | 141/362                     | 75               | 53,637,200 | 4.02      | 0.03           | 38,376,747              |
| V1.CD-15  | 143/351                     | 75               | 53,938,600 | 4.05      | 2.85           | 40,560,446              |
| O2.UC-19  | 133/352                     | 75               | 54,537,600 | 4.09      | 0.01           | 38,459,550              |
| MH0004    | 218                         | 44               | 55,829,800 | 2.46      | 0.95           | 40,288,492              |
| MH0062    | 144/357                     | 75               | 57,128,400 | 4.28      | 14.32          | 36,809,224              |
| MH0066    | 147/429                     | 75               | 57,234,200 | 4.29      | 0.05           | 36,114,997              |
| O2.UC-21  | 142/362                     | 75               | 57,856,000 | 4.34      | 0.03           | 34,832,308              |
| V1.CD-13  | 139/352                     | 75               | 58,145,800 | 4.36      | 0.04           | 42,560,831              |
| MH0080    | 140/376                     | 75               | 58,220,800 | 4.37      | 0.13           | 46,590,749              |
| V1.UC-13  | 131/352                     | 75               | 58,381,400 | 4.38      | 9.77           | 38,553,580              |
| MH0032    | 142/370                     | 75               | 58,822,400 | 3.93      | 0.39           | 50,110,067              |
| O2.UC-12  | 153/384                     | 75               | 58,927,800 | 4.42      | 0.12           | 36,908,526              |
| MH0001    | 214                         | 44               | 59,239,200 | 2.61      | 0.06           | 45,016,612              |
| V1.UC-6   | 142/376                     | 75               | 59,270,800 | 4.45      | 0.41           | 43,150,856              |
| MH0060    | 142/367                     | 75               | 60,156,000 | 4.51      | 0.07           | 41,112,227              |
| MH0053    | 137/416                     | 75               | 60,788,600 | 4.56      | 0.07           | 43,283,564              |
| MH0002    | 139/370                     | 75               | 61,077,000 | 4.58      | 0.15           | 46,570,095              |
| O2.UC-11  | 142/377                     | 75               | 61,253,800 | 4.59      | 0.14           | 38,507,042              |
| MH0059    | 136/370                     | 75               | 61,574,600 | 4.62      | 0.18           | 41,025,606              |



|          |         |    |            |      |       |            |
|----------|---------|----|------------|------|-------|------------|
| V1.UC-8  | 131/346 | 75 | 61,781,000 | 4.63 | 0.54  | 46,669,762 |
| O2.UC-1  | 142/363 | 75 | 61,879,000 | 4.64 | 5.78  | 42,189,776 |
| MH0054   | 137/401 | 75 | 62,086,000 | 4.66 | 0.15  | 42,262,748 |
| MH0030   | 142/354 | 75 | 62,148,800 | 4.18 | 0.57  | 51,622,803 |
| MH0046   | 140/372 | 75 | 62,539,800 | 4.69 | 0.06  | 35,798,104 |
| MH0040   | 136/373 | 75 | 62,661,200 | 4.70 | 0.05  | 44,249,732 |
| V1.UC-9  | 132/362 | 75 | 62,758,600 | 4.71 | 0.06  | 46,906,812 |
| MH0025   | 146/356 | 75 | 62,948,000 | 4.22 | 0.06  | 55,604,591 |
| V1.UC-10 | 141/356 | 75 | 63,137,000 | 4.74 | 9.54  | 41,725,594 |
| O2.UC-22 | 140/363 | 75 | 63,220,000 | 4.74 | 0.04  | 44,245,030 |
| V1.CD-14 | 143/356 | 75 | 63,574,000 | 4.77 | 0.06  | 44,023,096 |
| O2.UC-17 | 135/350 | 75 | 63,583,000 | 4.77 | 0.02  | 40,304,612 |
| MH0028   | 138/368 | 75 | 63,652,000 | 4.25 | 0.04  | 55,152,519 |
| MH0057   | 140/379 | 75 | 64,021,000 | 4.80 | 0.09  | 43,050,028 |
| MH0024   | 124/353 | 75 | 64,097,000 | 4.30 | 0.10  | 54,915,985 |
| V1.CD-9  | 137/348 | 75 | 64,146,600 | 4.81 | 0.05  | 47,137,595 |
| MH0041   | 141/364 | 75 | 64,246,800 | 4.82 | 0.44  | 44,382,480 |
| MH0037   | 145/377 | 75 | 64,247,400 | 4.82 | 0.05  | 42,034,099 |
| O2.UC-24 | 142/372 | 75 | 64,629,200 | 4.85 | 0.25  | 41,658,584 |
| O2.UC-16 | 134/352 | 75 | 64,811,000 | 4.86 | 0.01  | 42,268,974 |
| O2.UC-23 | 141/363 | 75 | 64,898,800 | 4.87 | 21.33 | 36,784,558 |
| MH0055   | 137/412 | 75 | 65,444,600 | 4.91 | 0.09  | 47,112,307 |
| V1.UC-21 | 150/372 | 75 | 65,652,400 | 4.92 | 0.41  | 46,336,135 |
| MH0071   | 137/388 | 75 | 65,684,000 | 4.93 | 0.23  | 46,242,273 |
| MH0050   | 141/339 | 75 | 65,725,200 | 4.93 | 0.05  | 47,792,033 |
| MH0020   | 148/375 | 75 | 66,964,400 | 5.02 | 0.61  | 45,813,646 |
| MH0081   | 128/365 | 75 | 66,988,600 | 5.02 | 0.04  | 47,851,897 |
| V1.UC-18 | 146/374 | 75 | 67,064,200 | 5.03 | 0.14  | 48,379,265 |
| MH0085   | 136/379 | 75 | 67,083,400 | 5.03 | 0.08  | 49,434,491 |
| O2.UC-18 | 138/360 | 75 | 67,094,400 | 5.03 | 0.08  | 41,907,663 |
| MH0044   | 139/383 | 75 | 67,124,400 | 5.03 | 0.05  | 44,864,080 |
| MH0074   | 142/394 | 75 | 67,143,600 | 5.04 | 0.03  | 46,030,505 |
| MH0068   | 145/366 | 75 | 67,160,800 | 5.04 | 0.09  | 43,867,534 |
| MH0031   | 136/381 | 75 | 67,460,600 | 4.54 | 0.72  | 55,540,263 |
| MH0045   | 130/380 | 75 | 67,520,800 | 5.06 | 0.13  | 49,434,301 |
| V1.CD-3  | 144/374 | 75 | 67,524,800 | 5.06 | 0.38  | 45,352,742 |
| MH0033   | 148/377 | 75 | 67,543,400 | 5.07 | 0.05  | 44,996,133 |
| MH0064   | 142/375 | 75 | 67,747,800 | 5.08 | 0.13  | 44,732,297 |
| MH0083   | 133/378 | 75 | 68,074,800 | 5.11 | 0.03  | 47,903,806 |
| MH0082   | 134/359 | 75 | 68,130,400 | 5.11 | 0.19  | 48,347,954 |
| V1.UC-15 | 139/367 | 75 | 68,192,000 | 5.11 | 1.95  | 46,595,929 |
| MH0058   | 145/369 | 75 | 68,286,800 | 5.12 | 0.13  | 49,822,998 |
| V1.UC-19 | 141/354 | 75 | 68,295,000 | 5.12 | 0.12  | 49,233,576 |
| O2.UC-13 | 143/364 | 75 | 68,563,400 | 5.14 | 0.08  | 43,619,828 |
| V1.UC-14 | 142/363 | 75 | 68,566,800 | 5.14 | 0.68  | 49,611,323 |
| V1.CD-8  | 145/356 | 75 | 68,642,000 | 5.15 | 0.11  | 49,908,306 |
| MH0067   | 135/369 | 75 | 68,699,200 | 5.15 | 0.02  | 44,484,637 |
| O2.UC-4  | 140/361 | 75 | 68,735,200 | 5.16 | 0.15  | 43,263,975 |
| MH0065   | 144/420 | 75 | 68,945,200 | 5.17 | 0.14  | 44,579,795 |
| MH0056   | 135/368 | 75 | 68,969,600 | 5.17 | 0.78  | 49,219,471 |

|                |         |       |                      |               |               |                      |
|----------------|---------|-------|----------------------|---------------|---------------|----------------------|
| MH0003         | 143/357 | 75    | 69,136,400           | 5.19          | 0.07          | 50,384,869           |
| MH0075         | 136/382 | 75    | 69,195,400           | 5.19          | 0.03          | 47,065,103           |
| MH0061         | 134/362 | 75    | 69,261,600           | 5.19          | 2.08          | 44,515,482           |
| V1.CD-6        | 136/358 | 75    | 69,437,200           | 5.21          | 2.65          | 42,483,316           |
| V1.CD-1        | 143/366 | 75    | 69,669,800           | 5.23          | 0.11          | 47,131,739           |
| MH0070         | 137/363 | 75    | 69,670,400           | 5.23          | 0.17          | 47,921,594           |
| V1.CD-4        | 142/375 | 75    | 70,111,400           | 5.26          | 0.04          | 42,939,132           |
| V1.CD-2        | 142/374 | 75    | 70,150,600           | 5.26          | 0.36          | 46,703,072           |
| MH0063         | 141/371 | 75    | 70,215,000           | 5.27          | 0.08          | 45,961,029           |
| MH0077         | 135/377 | 75    | 70,381,000           | 5.28          | 0.27          | 49,660,515           |
| MH0039         | 144/370 | 75    | 70,466,000           | 5.28          | 0.04          | 42,717,184           |
| MH0073         | 139/373 | 75    | 71,179,400           | 5.34          | 0.15          | 47,234,201           |
| MH0036         | 142/368 | 75    | 71,764,000           | 5.38          | 0.14          | 47,706,635           |
| V1.UC-17       | 138/356 | 75    | 72,222,200           | 5.42          | 26.13         | 34,437,937           |
| MH0035         | 138/355 | 75    | 72,306,000           | 5.42          | 0.80          | 49,289,239           |
| MH0042         | 141/416 | 75    | 72,568,200           | 5.44          | 0.36          | 43,424,052           |
| MH0038         | 144/372 | 75    | 74,210,800           | 5.57          | 0.25          | 45,475,391           |
| MH0043         | 143/366 | 75    | 74,479,600           | 5.59          | 0.82          | 49,362,253           |
| MH0084         | 140/365 | 75    | 75,047,200           | 5.63          | 0.07          | 53,565,815           |
| V1.CD-11       | 138/348 | 75    | 75,344,800           | 5.65          | 0.02          | 51,389,665           |
| MH0016         | 131/374 | 75    | 76,178,600           | 5.71          | 0.08          | 54,396,021           |
| MH0014         | 141/390 | 75    | 77,468,200           | 5.81          | 0.21          | 56,304,766           |
| MH0086         | 146/432 | 75    | 78,495,800           | 5.89          | 0.04          | 55,433,667           |
| MH0011         | 146/368 | 75    | 79,208,000           | 5.94          | 0.27          | 58,503,358           |
| MH0009         | 146/373 | 75    | 80,011,000           | 6.00          | 0.14          | 58,452,504           |
| MH0072         | 147/435 | 75    | 89,101,800           | 6.68          | 0.19          | 49,286,672           |
| MH0034         | 147/373 | 75    | 94,636,800           | 7.10          | 0.01          | 37,400,897           |
| MH0069         | 152/430 | 75    | 97,568,600           | 7.32          | 0.06          | 69,722,220           |
|                |         |       |                      |               |               |                      |
| MH0006         | 233     | 44/75 | 188,437,600          | 12.60         | 0.39          | 161,184,217          |
| MH0012         | 134/378 | 75    | 221,338,200          | 16.60         | 0.05          | 186,062,388          |
|                |         |       |                      |               |               |                      |
| <b>Total</b>   |         |       | <b>8,037,389,400</b> | <b>576.72</b> | <b>Median</b> | <b>5,637,140,962</b> |
| <b>Average</b> |         |       | <b>62,521,423</b>    | <b>4.49</b>   | <b>0.12</b>   | <b>43,359,790</b>    |

**Table 4 | Summary of de novo assembly results.** Assembled sequences with length below 500 bp were excluded from the contig set.

| Sample ID | # of contigs | Contig N50 (bp) | Total length (Mb) | % reads assembled | Unassembled reads (Gb) |
|-----------|--------------|-----------------|-------------------|-------------------|------------------------|
| MH0001    | 14,301       | 1,618           | 19.69             | 46.34             | 1.06                   |
| MH0002    | 65,392       | 1,680           | 88.77             | 45.31             | 1.91                   |
| MH0003    | 68,658       | 2,640           | 119.59            | 54.40             | 1.72                   |
| MH0004    | 23,793       | 1,681           | 31.92             | 41.54             | 1.05                   |
| MH0005    | 14,339       | 1,684           | 19.62             | 40.22             | 1.04                   |
| MH0006    | 144,440      | 2,025           | 217.77            | 52.39             | 5.24                   |
| MH0007    | 28,108       | 1,270           | 32.00             | 29.15             | 1.16                   |
| MH0008    | 26,506       | 1,768           | 37.24             | 43.53             | 0.95                   |
| MH0009    | 70,014       | 2,440           | 112.96            | 44.14             | 2.45                   |
| MH0010    | 25,674       | 1,815           | 36.52             | 48.77             | 0.88                   |
| MH0011    | 86,201       | 2,158           | 134.25            | 46.09             | 2.37                   |
| MH0012    | 140,991      | 2,478           | 237.58            | 42.77             | 7.99                   |
| MH0013    | 20,495       | 2,332           | 32.20             | 41.22             | 1.05                   |
| MH0014    | 66,724       | 2,957           | 120.54            | 50.90             | 2.08                   |
| MH0015    | 25,933       | 1,645           | 34.46             | 35.53             | 0.94                   |
| MH0016    | 64,124       | 2,915           | 114.03            | 53.89             | 1.88                   |
| MH0017    | 24,948       | 1,679           | 34.06             | 39.57             | 0.96                   |
| MH0018    | 13,247       | 1,619           | 17.73             | 35.23             | 1.07                   |
| MH0019    | 28,786       | 1,977           | 41.95             | 46.76             | 0.91                   |
| MH0020    | 44,930       | 4,708           | 98.78             | 56.81             | 1.49                   |
| MH0021    | 54,101       | 1,608           | 70.67             | 46.49             | 1.06                   |
| MH0022    | 21,872       | 1,773           | 30.00             | 35.04             | 1.06                   |
| MH0023    | 16,214       | 2,100           | 25.57             | 35.80             | 1.07                   |
| MH0024    | 43,145       | 1,512           | 54.45             | 33.21             | 2.41                   |
| MH0025    | 76,287       | 1,968           | 111.48            | 42.24             | 2.11                   |
| MH0026    | 33,408       | 3,769           | 69.38             | 43.97             | 1.58                   |
| MH0027    | 20,369       | 985             | 19.72             | 19.96             | 1.14                   |
| MH0028    | 61,004       | 2,630           | 104.54            | 49.65             | 1.80                   |
| MH0030    | 39,267       | 2,828           | 66.60             | 36.73             | 2.15                   |
| MH0031    | 53,292       | 1,878           | 75.84             | 36.41             | 2.33                   |
| MH0032    | 37,287       | 1,921           | 54.46             | 20.72             | 2.60                   |
| MH0033    | 61,782       | 2,616           | 102.04            | 49.87             | 1.69                   |
| MH0034    | 24,508       | 2,107           | 37.63             | 14.53             | 2.40                   |
| MH0035    | 68,287       | 2,075           | 102.94            | 48.22             | 1.93                   |
| MH0036    | 58,690       | 2,330           | 94.35             | 49.44             | 1.81                   |
| MH0037    | 48,356       | 2,526           | 80.44             | 48.21             | 1.63                   |
| MH0038    | 50,381       | 2,921           | 90.35             | 47.75             | 1.79                   |
| MH0039    | 66,509       | 2,087           | 104.17            | 47.66             | 1.68                   |
| MH0040    | 73,068       | 2,225           | 115.15            | 49.53             | 1.68                   |

|        |        |       |        |       |      |
|--------|--------|-------|--------|-------|------|
| MH0041 | 55,146 | 2,531 | 91.83  | 52.02 | 1.60 |
| MH0042 | 60,378 | 2,046 | 90.65  | 34.38 | 2.14 |
| MH0043 | 74,846 | 1,987 | 111.11 | 47.58 | 1.96 |
| MH0044 | 49,190 | 3,590 | 96.43  | 50.68 | 1.66 |
| MH0045 | 65,434 | 1,898 | 94.43  | 49.18 | 1.89 |
| MH0046 | 50,836 | 2,290 | 81.81  | 43.04 | 1.53 |
| MH0047 | 36,612 | 1,374 | 44.15  | 41.16 | 1.19 |
| MH0048 | 48,416 | 1,460 | 60.16  | 37.77 | 1.26 |
| MH0049 | 29,468 | 2,514 | 47.75  | 42.90 | 1.31 |
| MH0050 | 71,587 | 2,096 | 109.04 | 49.10 | 1.83 |
| MH0051 | 48,208 | 1,690 | 65.49  | 43.82 | 1.10 |
| MH0052 | 53,204 | 1,642 | 70.93  | 41.89 | 1.25 |
| MH0053 | 52,816 | 2,396 | 86.76  | 42.96 | 1.85 |
| MH0054 | 59,223 | 2,669 | 102.44 | 54.54 | 1.44 |
| MH0055 | 61,507 | 2,511 | 104.18 | 50.22 | 1.76 |
| MH0056 | 71,029 | 1,678 | 95.95  | 32.90 | 2.80 |
| MH0057 | 40,554 | 2,691 | 72.17  | 49.88 | 1.62 |
| MH0058 | 75,310 | 2,136 | 116.26 | 46.07 | 2.02 |
| MH0059 | 77,573 | 2,176 | 124.22 | 48.44 | 1.59 |
| MH0060 | 63,059 | 1,966 | 92.86  | 47.05 | 1.63 |
| MH0061 | 37,149 | 3,619 | 73.17  | 48.68 | 1.75 |
| MH0062 | 59,196 | 2,134 | 90.62  | 40.38 | 1.92 |
| MH0063 | 56,634 | 2,049 | 84.50  | 39.93 | 2.07 |
| MH0064 | 54,725 | 2,187 | 85.58  | 32.20 | 2.28 |
| MH0065 | 69,122 | 2,083 | 104.22 | 44.04 | 1.87 |
| MH0066 | 56,860 | 2,466 | 92.91  | 42.80 | 1.55 |
| MH0067 | 41,271 | 4,494 | 95.51  | 62.76 | 1.24 |
| MH0068 | 45,417 | 3,249 | 83.23  | 49.89 | 1.65 |
| MH0069 | 80,769 | 1,908 | 117.50 | 39.35 | 3.17 |
| MH0070 | 72,871 | 2,208 | 112.98 | 46.83 | 1.91 |
| MH0071 | 53,046 | 2,810 | 92.40  | 37.73 | 2.16 |
| MH0072 | 52,323 | 1,784 | 74.17  | 36.22 | 2.36 |
| MH0073 | 56,858 | 2,125 | 87.06  | 53.49 | 1.65 |
| MH0074 | 44,523 | 3,990 | 95.83  | 56.27 | 1.51 |
| MH0075 | 68,045 | 2,089 | 103.76 | 45.96 | 1.91 |
| MH0076 | 57,502 | 1,812 | 80.56  | 47.18 | 1.22 |
| MH0077 | 78,357 | 1,744 | 108.27 | 47.23 | 1.97 |
| MH0078 | 22,164 | 1,658 | 30.01  | 25.41 | 1.48 |
| MH0079 | 48,717 | 1,622 | 64.50  | 48.42 | 1.06 |
| MH0080 | 76,021 | 2,074 | 116.51 | 54.64 | 1.59 |
| MH0081 | 73,686 | 1,930 | 108.94 | 51.34 | 1.75 |
| MH0082 | 73,890 | 2,211 | 115.72 | 49.36 | 1.84 |
| MH0083 | 66,302 | 2,337 | 107.84 | 50.17 | 1.79 |

|          |        |       |        |       |      |
|----------|--------|-------|--------|-------|------|
| MH0084   | 32,542 | 2,233 | 50.16  | 19.55 | 3.23 |
| MH0085   | 47,522 | 2,935 | 86.29  | 43.61 | 2.09 |
| MH0086   | 88,752 | 2,381 | 148.47 | 53.70 | 1.93 |
| O2.UC-1  | 51,221 | 1,682 | 69.20  | 35.00 | 2.18 |
| O2.UC-11 | 36,782 | 1,670 | 50.37  | 26.39 | 2.13 |
| O2.UC-12 | 47,451 | 2,264 | 75.28  | 40.28 | 1.66 |
| O2.UC-13 | 54,055 | 2,853 | 95.05  | 48.36 | 1.69 |
| O2.UC-14 | 26,263 | 2,135 | 39.80  | 27.46 | 1.47 |
| O2.UC-16 | 25,434 | 1,561 | 33.39  | 14.31 | 2.72 |
| O2.UC-17 | 31,446 | 1,486 | 40.55  | 20.05 | 2.42 |
| O2.UC-18 | 36,747 | 3,824 | 74.01  | 39.66 | 1.90 |
| O2.UC-19 | 59,079 | 2,311 | 92.86  | 47.36 | 1.52 |
| O2.UC-20 | 57,728 | 1,836 | 82.85  | 46.40 | 1.54 |
| O2.UC-21 | 37,854 | 1,478 | 47.55  | 23.14 | 2.01 |
| O2.UC-22 | 66,174 | 1,989 | 100.24 | 45.25 | 1.82 |
| O2.UC-23 | 46,329 | 1,959 | 66.70  | 27.21 | 2.60 |
| O2.UC-24 | 48,257 | 2,350 | 76.25  | 31.12 | 2.16 |
| O2.UC-4  | 52,210 | 2,293 | 82.94  | 44.75 | 1.80 |
| V1.CD-1  | 30,435 | 2,912 | 54.83  | 33.38 | 2.36 |
| V1.CD-11 | 43,837 | 3,775 | 83.58  | 47.70 | 2.02 |
| V1.CD-12 | 36,815 | 2,283 | 59.20  | 50.33 | 1.51 |
| V1.CD-13 | 63,979 | 2,207 | 99.94  | 48.08 | 1.66 |
| V1.CD-14 | 76,242 | 2,060 | 116.12 | 48.96 | 1.69 |
| V1.CD-15 | 30,840 | 3,185 | 56.10  | 46.47 | 1.68 |
| V1.CD-2  | 16,741 | 715   | 12.26  | 2.34  | 3.43 |
| V1.CD-3  | 49,312 | 1,986 | 74.88  | 39.79 | 2.06 |
| V1.CD-4  | 64,855 | 2,172 | 100.99 | 49.31 | 1.63 |
| V1.CD-6  | 52,405 | 1,912 | 76.79  | 45.10 | 1.80 |
| V1.CD-8  | 76,704 | 2,125 | 116.87 | 44.60 | 2.08 |
| V1.CD-9  | 51,597 | 3,444 | 99.57  | 53.10 | 1.66 |
| V1.UC-10 | 70,208 | 2,290 | 112.96 | 43.16 | 2.00 |
| V1.UC-13 | 54,707 | 2,788 | 94.12  | 47.55 | 1.70 |
| V1.UC-14 | 60,809 | 2,443 | 99.23  | 49.47 | 1.89 |
| V1.UC-15 | 59,391 | 2,731 | 104.22 | 50.02 | 1.78 |
| V1.UC-17 | 51,062 | 2,180 | 79.04  | 31.53 | 2.35 |
| V1.UC-18 | 54,194 | 2,721 | 94.28  | 54.98 | 1.64 |
| V1.UC-19 | 65,470 | 2,825 | 113.78 | 50.30 | 1.84 |
| V1.UC-21 | 55,907 | 2,226 | 89.43  | 49.60 | 1.76 |
| V1.UC-6  | 88,651 | 1,766 | 125.25 | 49.50 | 1.64 |
| V1.UC-7  | 35,227 | 2,405 | 56.97  | 28.50 | 2.31 |
| V1.UC-8  | 76,786 | 2,197 | 121.81 | 52.32 | 1.68 |
| V1.UC-9  | 69,741 | 1,842 | 99.85  | 43.12 | 2.00 |

**Table 5 | List of 194 public human gut bacterial genomes.** “HMP” stands for strains which were sequenced by the Human Microbiome Project of NIH (<http://nihroadmap.nih.gov/hmp/>); “MetaHIT” stands for strains which were sequenced by the MetaHIT Project of EU (<http://www.metahit.eu/>); “GenBank” stands for strains which were collected in GenBank database (<http://www.ncbi.nlm.nih.gov/>).

| <b>Organism</b>                                     | <b>Source</b> |
|-----------------------------------------------------|---------------|
| <i>Acidaminococcus</i> sp. D21                      | HMP           |
| <i>Actinomyces odontolyticus</i> ATCC 17982         | HMP           |
| <i>Alistipes putredinis</i> DSM 17216               | HMP           |
| <i>Anaerobaculum hydrogeniformans</i> ATCC BAA-1850 | HMP           |
| <i>Anaerococcus hydrogenalis</i> DSM 7454           | HMP           |
| <i>Anaerofustis stercorihominis</i> DSM 17244       | HMP           |
| <i>Anaerostipes caccae</i> DSM 14662                | HMP           |
| <i>Anaerotruncus colihominis</i> DSM 17241          | HMP           |
| <i>Bacteroides caccae</i> ATCC 43185                | HMP           |
| <i>Bacteroides capillosus</i> ATCC 29799            | HMP           |
| <i>Bacteroides cellulosilyticus</i> DSM 14838       | HMP           |
| <i>Bacteroides coprocola</i> DSM 17136              | HMP           |
| <i>Bacteroides coprophilus</i> DSM 18228            | HMP           |
| <i>Bacteroides dorei</i> DSM 17855                  | HMP           |
| <i>Bacteroides eggerthii</i> DSM 20697              | HMP           |
| <i>Bacteroides finegoldii</i> DSM 17565             | HMP           |
| <i>Bacteroides fragilis</i> 3_1_12                  | HMP           |
| <i>Bacteroides intestinalis</i> DSM 17393           | HMP           |
| <i>Bacteroides ovatus</i> ATCC 8483                 | HMP           |
| <i>Bacteroides pectinophilus</i> ATCC 43243         | HMP           |
| <i>Bacteroides plebeius</i> DSM 17135               | HMP           |
| <i>Bacteroides</i> sp. 1_1_6                        | HMP           |
| <i>Bacteroides</i> sp. 2_1_7                        | HMP           |
| <i>Bacteroides</i> sp. 2_2_4                        | HMP           |
| <i>Bacteroides</i> sp. 3_2_5                        | HMP           |
| <i>Bacteroides</i> sp. 4_3_47FAA                    | HMP           |
| <i>Bacteroides</i> sp. 9_1_42FAA                    | HMP           |
| <i>Bacteroides</i> sp. D1                           | HMP           |
| <i>Bacteroides</i> sp. D2                           | HMP           |
| <i>Bacteroides</i> sp. D4                           | HMP           |
| <i>Bacteroides stercoris</i> ATCC 43183             | HMP           |
| <i>Bacteroides uniformis</i> ATCC 8492              | HMP           |
| <i>Bifidobacterium adolescentis</i> L2-32           | HMP           |
| <i>Bifidobacterium angulatum</i> DSM 20098          | HMP           |
| <i>Bifidobacterium bifidum</i> NCIMB 41171          | HMP           |

|                                                                 |     |
|-----------------------------------------------------------------|-----|
| <i>Bifidobacterium breve</i> DSM 20213                          | HMP |
| <i>Bifidobacterium catenulatum</i> DSM 16992                    | HMP |
| <i>Bifidobacterium dentium</i> ATCC 27678                       | HMP |
| <i>Bifidobacterium gallicum</i> DSM 20093                       | HMP |
| <i>Bifidobacterium longum</i> subsp. <i>infantis</i> ATCC 55813 | HMP |
| <i>Bifidobacterium longum</i> subsp. <i>infantis</i> CCUG 52486 | HMP |
| <i>Bifidobacterium pseudocatenulatum</i> DSM 20438              | HMP |
| <i>Blautia hansenii</i> DSM 20583                               | HMP |
| <i>Blautia hydrogenotrophica</i> DSM 10507                      | HMP |
| <i>Bryantella formatexigens</i> DSM 14469                       | HMP |
| <i>Butyrivibrio crossotus</i> DSM 2876                          | HMP |
| <i>Catenibacterium mitsuokai</i> DSM 15897                      | HMP |
| <i>Citrobacter</i> sp. 30_2                                     | HMP |
| <i>Citrobacter youngae</i> ATCC 29220                           | HMP |
| <i>Clostridiales bacterium</i> 1_7_47FAA                        | HMP |
| <i>Clostridium asparagiforme</i> DSM 15981                      | HMP |
| <i>Clostridium bartlettii</i> DSM 16795                         | HMP |
| <i>Clostridium bolteae</i> ATCC BAA-613                         | HMP |
| <i>Clostridium hathewayi</i> DSM 13479                          | HMP |
| <i>Clostridium hiranonis</i> DSM 13275                          | HMP |
| <i>Clostridium hylemonae</i> DSM 15053                          | HMP |
| <i>Clostridium leptum</i> DSM 753                               | HMP |
| <i>Clostridium methylpentosum</i> DSM 5476                      | HMP |
| <i>Clostridium nexile</i> DSM 1787                              | HMP |
| <i>Clostridium ramosum</i> DSM 1402                             | HMP |
| <i>Clostridium scindens</i> ATCC 35704                          | HMP |
| <i>Clostridium</i> sp. 7_2_43FAA                                | HMP |
| <i>Clostridium</i> sp. L2-50                                    | HMP |
| <i>Clostridium</i> sp. M62/1                                    | HMP |
| <i>Clostridium</i> sp. SS2/1                                    | HMP |
| <i>Clostridium spiroforme</i> DSM 1552                          | HMP |
| <i>Clostridium sporogenes</i> ATCC 15579                        | HMP |
| <i>Clostridium symbiosum</i> ATCC 14940                         | HMP |
| <i>Collinsella aerofaciens</i> ATCC 25986                       | HMP |
| <i>Collinsella intestinalis</i> DSM 13280                       | HMP |
| <i>Collinsella stercoris</i> DSM 13279                          | HMP |
| <i>Coprococcus comes</i> ATCC 27758                             | HMP |
| <i>Coprococcus eutactus</i> ATCC 27759                          | HMP |
| <i>Desulfovibrio piger</i> ATCC 29098                           | HMP |
| <i>Dorea formicigenerans</i> ATCC 27755                         | HMP |
| <i>Dorea longicatena</i> DSM 13814                              | HMP |

|                                                                   |     |
|-------------------------------------------------------------------|-----|
| <i>Enterobacter cancerogenus</i> ATCC 35316                       | HMP |
| <i>Enterococcus faecalis</i> TX0104                               | HMP |
| <i>Enterococcus faecalis</i> TX1322                               | HMP |
| <i>Enterococcus faecium</i> TX1330                                | HMP |
| <i>Escherichia coli</i> SE11                                      | HMP |
| <i>Escherichia</i> sp. 1_1_43                                     | HMP |
| <i>Escherichia</i> sp. 3_2_53FAA                                  | HMP |
| <i>Escherichia</i> sp. 4_1_40B                                    | HMP |
| <i>Eubacterium bifforme</i> DSM 3989                              | HMP |
| <i>Eubacterium dolichum</i> DSM 3991                              | HMP |
| <i>Eubacterium hallii</i> DSM 3353                                | HMP |
| <i>Eubacterium siraeum</i> DSM 15702                              | HMP |
| <i>Eubacterium ventriosum</i> ATCC 27560                          | HMP |
| <i>Faecalibacterium prausnitzii</i> A2-165                        | HMP |
| <i>Faecalibacterium prausnitzii</i> M21/2                         | HMP |
| <i>Fusobacterium gonidiaformans</i> ATCC 25563                    | HMP |
| <i>Fusobacterium mortiferum</i> ATCC 9817                         | HMP |
| <i>Fusobacterium</i> sp. 2_1_31                                   | HMP |
| <i>Fusobacterium</i> sp. 4_1_13                                   | HMP |
| <i>Fusobacterium</i> sp. 7_1                                      | HMP |
| <i>Fusobacterium</i> sp. D11                                      | HMP |
| <i>Fusobacterium</i> sp. D12                                      | HMP |
| <i>Fusobacterium ulcerans</i> ATCC 49185                          | HMP |
| <i>Fusobacterium varium</i> ATCC 27725                            | HMP |
| <i>Helicobacter bilis</i> ATCC 43879                              | HMP |
| <i>Helicobacter canadensis</i> MIT 98-5491                        | HMP |
| <i>Helicobacter cinaedi</i> CCUG 18818                            | HMP |
| <i>Helicobacter pullorum</i> MIT 98-5489                          | HMP |
| <i>Helicobacter winghamensis</i> ATCC BAA-430                     | HMP |
| <i>Holdemania filiformis</i> DSM 12042                            | HMP |
| <i>Lactobacillus acidophilus</i> ATCC 4796                        | HMP |
| <i>Lactobacillus antri</i> DSM 16041                              | HMP |
| <i>Lactobacillus brevis</i> subsp. <i>gravesensis</i> ATCC 27305  | HMP |
| <i>Lactobacillus buchneri</i> ATCC 11577                          | HMP |
| <i>Lactobacillus fermentum</i> ATCC 14931                         | HMP |
| <i>Lactobacillus helveticus</i> DSM 20075                         | HMP |
| <i>Lactobacillus hilgardii</i> ATCC 8290                          | HMP |
| <i>Lactobacillus paracasei</i> subsp. <i>paracasei</i> 8700:2     | HMP |
| <i>Lactobacillus paracasei</i> subsp. <i>paracasei</i> ATCC 25302 | HMP |
| <i>Lactobacillus plantarum</i> subsp. <i>plantarum</i> ATCC 14917 | HMP |
| <i>Lactobacillus reuteri</i> CF48-3A                              | HMP |



|                                                                         |         |
|-------------------------------------------------------------------------|---------|
| <i>Lactobacillus reuteri</i> JCM 1112                                   | HMP     |
| <i>Lactobacillus reuteri</i> MM2-3                                      | HMP     |
| <i>Lactobacillus reuteri</i> MM4-1A                                     | HMP     |
| <i>Lactobacillus reuteri</i> SD2112                                     | HMP     |
| <i>Lactobacillus rhamnosus</i> LMS2-1                                   | HMP     |
| <i>Lactobacillus ruminis</i> ATCC 25644                                 | HMP     |
| <i>Lactobacillus salivarius</i> ATCC 11741                              | HMP     |
| <i>Lactobacillus ultunensis</i> DSM 16047                               | HMP     |
| <i>Leuconostoc mesenteroides</i> subsp. <i>cremoris</i> ATCC 19254      | HMP     |
| <i>Listeria grayi</i> DSM 20601                                         | HMP     |
| <i>Methanobrevibacter smithii</i> DSM 2374                              | HMP     |
| <i>Methanobrevibacter smithii</i> DSM 2375                              | HMP     |
| <i>Mitsuokella multacida</i> DSM 20544                                  | HMP     |
| <i>Mollicutes bacterium</i> D7                                          | HMP     |
| <i>Oxalobacter formigenes</i> HOxBLS                                    | HMP     |
| <i>Oxalobacter formigenes</i> OXCC13                                    | HMP     |
| <i>Parabacteroides johnsonii</i> DSM 18315                              | HMP     |
| <i>Parabacteroides merdae</i> ATCC 43184                                | HMP     |
| <i>Parvimonas micra</i> ATCC 33270                                      | HMP     |
| <i>Prevotella copri</i> DSM 18205                                       | HMP     |
| <i>Proteus penneri</i> ATCC 35198                                       | HMP     |
| <i>Providencia alcalifaciens</i> DSM 30120                              | HMP     |
| <i>Providencia rettgeri</i> DSM 1131                                    | HMP     |
| <i>Providencia rustigianii</i> DSM 4541                                 | HMP     |
| <i>Providencia stuartii</i> ATCC 25827                                  | HMP     |
| <i>Roseburia intestinalis</i> LI-82                                     | HMP     |
| <i>Roseburia inulinivorans</i> DSM 16841                                | HMP     |
| <i>Ruminococcus gnavus</i> ATCC 29149                                   | HMP     |
| <i>Ruminococcus lactaris</i> ATCC 29176                                 | HMP     |
| <i>Ruminococcus obeum</i> ATCC 29174                                    | HMP     |
| <i>Ruminococcus</i> sp. 5_1_39BFAA                                      | HMP     |
| <i>Ruminococcus torques</i> ATCC 27756                                  | HMP     |
| <i>Streptococcus infantarius</i> subsp. <i>infantarius</i> ATCC BAA-102 | HMP     |
| <i>Subdoligranulum variabile</i> DSM 15176                              | HMP     |
| <i>Weissella paramesenteroides</i> ATCC 33313                           | HMP     |
| <i>Bacteroides xylanisolvens</i> XB1A                                   | MetaHIT |
| <i>Butyrivibrio fibrisolvens</i> 16/4                                   | MetaHIT |
| <i>Coprococcus comes</i> SL7/1                                          | MetaHIT |
| <i>Enterococcus</i> sp. 7L76                                            | MetaHIT |
| <i>Eubacterium rectale</i> DSM 17629                                    | MetaHIT |
| <i>Eubacterium rectale</i> M104/1                                       | MetaHIT |

|                                                                        |         |
|------------------------------------------------------------------------|---------|
| <i>Eubacterium siraeum</i> 70/3                                        | MetaHIT |
| <i>Faecalibacterium prausnitzii</i> SL3/3                              | MetaHIT |
| <i>Gordonibacter pamelaee</i> 7-10-1-b                                 | MetaHIT |
| <i>Megamonas hypermegale</i> ART12/1                                   | MetaHIT |
| <i>Roseburia intestinalis</i> M50/1                                    | MetaHIT |
| <i>Ruminococcus bromii</i> L2-63                                       | MetaHIT |
| <i>Ruminococcus obeum</i> A2-162                                       | MetaHIT |
| <i>Ruminococcus</i> sp. 18P13                                          | MetaHIT |
| <i>Ruminococcus</i> sp. SR1/5                                          | MetaHIT |
| <i>Ruminococcus torques</i> L2-14                                      | MetaHIT |
| unknown sp. SS3/4                                                      | MetaHIT |
| <i>Bacteroides fragilis</i> NCTC 9343                                  | GenBank |
| <i>Bacteroides fragilis</i> YCH46                                      | GenBank |
| <i>Bacteroides thetaiotaomicron</i> VPI-5482                           | GenBank |
| <i>Bacteroides vulgatus</i> ATCC 8482                                  | GenBank |
| <i>Bifidobacterium adolescentis</i> ATCC 15703                         | GenBank |
| <i>Bifidobacterium animalis</i> subsp. <i>lactis</i> AD011             | GenBank |
| <i>Bifidobacterium longum</i> DJO10A                                   | GenBank |
| <i>Bifidobacterium longum</i> NCC2705                                  | GenBank |
| <i>Bifidobacterium longum</i> subsp. <i>infantis</i> ATCC 15697        | GenBank |
| <i>Lactobacillus acidophilus</i> NCFM                                  | GenBank |
| <i>Lactobacillus brevis</i> ATCC 367                                   | GenBank |
| <i>Lactobacillus casei</i> ATCC 334                                    | GenBank |
| <i>Lactobacillus casei</i> BL23                                        | GenBank |
| <i>Lactobacillus delbrueckii</i> subsp. <i>bulgaricus</i> ATCC 11842   | GenBank |
| <i>Lactobacillus delbrueckii</i> subsp. <i>bulgaricus</i> ATCC BAA-365 | GenBank |
| <i>Lactobacillus fermentum</i> IFO 3956                                | GenBank |
| <i>Lactobacillus gasseri</i> ATCC 33323                                | GenBank |
| <i>Lactobacillus helveticus</i> DPC 4571                               | GenBank |
| <i>Lactobacillus johnsonii</i> NCC 533                                 | GenBank |
| <i>Lactobacillus plantarum</i> WCFS1                                   | GenBank |
| <i>Lactobacillus reuteri</i> DSM 20016                                 | GenBank |
| <i>Lactobacillus sakei</i> subsp. <i>sakei</i> 23K                     | GenBank |
| <i>Lactobacillus salivarius</i> UCC118                                 | GenBank |
| <i>Methanobrevibacter smithii</i> ATCC 35061                           | GenBank |
| <i>Parabacteroides distasonis</i> ATCC 8503                            | GenBank |

**Table 6| ORF prediction in each sample.** ORFs were predicted in each of the 124 samples. The ORFs with length shorter than 100 bp were disregarded.

| Sample ID | # ORFs  | Average length (bp) | # complete ORFs | % complete ORFs | # fragmental ORFs | % fragmental ORFs |
|-----------|---------|---------------------|-----------------|-----------------|-------------------|-------------------|
| MH0001    | 26,953  | 642                 | 9,628           | 35.72           | 17,325            | 64.28             |
| MH0002    | 125,165 | 613                 | 43,569          | 34.81           | 81,596            | 65.19             |
| MH0003    | 148,803 | 699                 | 63,829          | 42.89           | 84,974            | 57.11             |
| MH0004    | 42,407  | 656                 | 14,401          | 33.96           | 28,006            | 66.04             |
| MH0005    | 25,817  | 675                 | 9,036           | 35.00           | 16,781            | 65.00             |
| MH0006    | 286,373 | 666                 | 111,390         | 38.90           | 174,983           | 61.10             |
| MH0007    | 48,189  | 583                 | 12,977          | 26.93           | 35,212            | 73.07             |
| MH0008    | 50,568  | 646                 | 17,961          | 35.52           | 32,607            | 64.48             |
| MH0009    | 148,232 | 658                 | 61,414          | 41.43           | 86,818            | 58.57             |
| MH0010    | 46,365  | 695                 | 16,148          | 34.83           | 30,217            | 65.17             |
| MH0011    | 176,165 | 662                 | 70,159          | 39.83           | 106,006           | 60.17             |
| MH0012    | 305,090 | 679                 | 130,932         | 42.92           | 174,158           | 57.08             |
| MH0013    | 42,940  | 652                 | 17,238          | 40.14           | 25,702            | 59.86             |
| MH0014    | 148,583 | 706                 | 67,551          | 45.46           | 81,032            | 54.54             |
| MH0015    | 46,940  | 646                 | 15,567          | 33.16           | 31,373            | 66.84             |
| MH0016    | 140,136 | 708                 | 61,436          | 43.84           | 78,700            | 56.16             |
| MH0017    | 45,651  | 655                 | 15,446          | 33.83           | 30,205            | 66.17             |
| MH0018    | 23,198  | 664                 | 7,842           | 33.80           | 15,356            | 66.20             |
| MH0019    | 54,726  | 675                 | 19,984          | 36.52           | 34,742            | 63.48             |
| MH0020    | 113,474 | 749                 | 57,530          | 50.70           | 55,944            | 49.30             |
| MH0021    | 98,576  | 619                 | 31,137          | 31.59           | 67,439            | 68.41             |
| MH0022    | 40,092  | 648                 | 13,638          | 34.02           | 26,454            | 65.98             |
| MH0023    | 32,786  | 683                 | 13,750          | 41.94           | 19,036            | 58.06             |
| MH0024    | 76,889  | 610                 | 23,900          | 31.08           | 52,989            | 68.92             |
| MH0025    | 150,162 | 642                 | 55,644          | 37.06           | 94,518            | 62.94             |
| MH0026    | 82,651  | 731                 | 41,390          | 50.08           | 41,261            | 49.92             |
| MH0027    | 30,170  | 575                 | 6,342           | 21.02           | 23,828            | 78.98             |
| MH0028    | 131,576 | 694                 | 56,516          | 42.95           | 75,060            | 57.05             |
| MH0030    | 84,874  | 675                 | 37,905          | 44.66           | 46,969            | 55.34             |
| MH0031    | 102,769 | 638                 | 38,113          | 37.09           | 64,656            | 62.91             |
| MH0032    | 74,382  | 630                 | 27,259          | 36.65           | 47,123            | 63.35             |
| MH0033    | 131,550 | 671                 | 55,397          | 42.11           | 76,153            | 57.89             |
| MH0034    | 50,355  | 642                 | 19,711          | 39.14           | 30,644            | 60.86             |
| MH0035    | 136,131 | 659                 | 51,188          | 37.60           | 84,943            | 62.40             |
| MH0036    | 121,152 | 678                 | 48,173          | 39.76           | 72,979            | 60.24             |
| MH0037    | 103,128 | 670                 | 42,830          | 41.53           | 60,298            | 58.47             |

|        |         |     |        |       |        |       |
|--------|---------|-----|--------|-------|--------|-------|
| MH0038 | 112,073 | 703 | 49,394 | 44.07 | 62,679 | 55.93 |
| MH0039 | 136,058 | 663 | 51,819 | 38.09 | 84,239 | 61.91 |
| MH0040 | 148,102 | 678 | 58,437 | 39.46 | 89,665 | 60.54 |
| MH0041 | 116,738 | 683 | 48,757 | 41.77 | 67,981 | 58.23 |
| MH0042 | 122,426 | 639 | 46,948 | 38.35 | 75,478 | 61.65 |
| MH0043 | 148,817 | 635 | 58,060 | 39.01 | 90,757 | 60.99 |
| MH0044 | 116,106 | 719 | 56,018 | 48.25 | 60,088 | 51.75 |
| MH0045 | 126,089 | 654 | 45,612 | 36.17 | 80,477 | 63.83 |
| MH0046 | 103,499 | 685 | 40,886 | 39.50 | 62,613 | 60.50 |
| MH0047 | 62,694  | 608 | 18,171 | 28.98 | 44,523 | 71.02 |
| MH0048 | 85,939  | 605 | 25,996 | 30.25 | 59,943 | 69.75 |
| MH0049 | 60,622  | 686 | 24,732 | 40.80 | 35,890 | 59.20 |
| MH0050 | 143,875 | 656 | 54,717 | 38.03 | 89,158 | 61.97 |
| MH0051 | 88,456  | 639 | 28,642 | 32.38 | 59,814 | 67.62 |
| MH0052 | 97,090  | 633 | 32,176 | 33.14 | 64,914 | 66.86 |
| MH0053 | 111,733 | 676 | 47,518 | 42.53 | 64,215 | 57.47 |
| MH0054 | 128,550 | 697 | 55,568 | 43.23 | 72,982 | 56.77 |
| MH0055 | 131,643 | 685 | 55,739 | 42.34 | 75,904 | 57.66 |
| MH0056 | 133,176 | 624 | 43,738 | 32.84 | 89,438 | 67.16 |
| MH0057 | 88,567  | 697 | 37,964 | 42.86 | 50,603 | 57.14 |
| MH0058 | 151,512 | 663 | 57,544 | 37.98 | 93,968 | 62.02 |
| MH0059 | 160,668 | 671 | 63,106 | 39.28 | 97,562 | 60.72 |
| MH0060 | 123,934 | 653 | 45,801 | 36.96 | 78,133 | 63.04 |
| MH0061 | 88,369  | 712 | 42,577 | 48.18 | 45,792 | 51.82 |
| MH0062 | 118,425 | 666 | 45,459 | 38.39 | 72,966 | 61.61 |
| MH0063 | 113,469 | 640 | 45,151 | 39.79 | 68,318 | 60.21 |
| MH0064 | 112,407 | 661 | 44,667 | 39.74 | 67,740 | 60.26 |
| MH0065 | 140,752 | 647 | 55,470 | 39.41 | 85,282 | 60.59 |
| MH0066 | 119,279 | 679 | 49,353 | 41.38 | 69,926 | 58.62 |
| MH0067 | 109,111 | 761 | 57,553 | 52.75 | 51,558 | 47.25 |
| MH0068 | 101,942 | 706 | 46,641 | 45.75 | 55,301 | 54.25 |
| MH0069 | 159,490 | 640 | 60,084 | 37.67 | 99,406 | 62.33 |
| MH0070 | 149,652 | 656 | 59,730 | 39.91 | 89,922 | 60.09 |
| MH0071 | 116,441 | 681 | 50,735 | 43.57 | 65,706 | 56.43 |
| MH0072 | 100,344 | 634 | 35,870 | 35.75 | 64,474 | 64.25 |
| MH0073 | 113,509 | 666 | 43,560 | 38.38 | 69,949 | 61.62 |
| MH0074 | 111,740 | 745 | 56,905 | 50.93 | 54,835 | 49.07 |
| MH0075 | 136,521 | 663 | 52,612 | 38.54 | 83,909 | 61.46 |
| MH0076 | 109,477 | 643 | 38,622 | 35.28 | 70,855 | 64.72 |
| MH0077 | 151,491 | 620 | 53,714 | 35.46 | 97,777 | 64.54 |
| MH0078 | 41,852  | 615 | 14,845 | 35.47 | 27,007 | 64.53 |
| MH0079 | 91,926  | 603 | 31,462 | 34.23 | 60,464 | 65.77 |
| MH0080 | 153,127 | 660 | 58,112 | 37.95 | 95,015 | 62.05 |

|          |         |     |        |       |         |       |
|----------|---------|-----|--------|-------|---------|-------|
| MH0081   | 147,079 | 642 | 55,132 | 37.48 | 91,947  | 62.52 |
| MH0082   | 153,163 | 656 | 60,893 | 39.76 | 92,270  | 60.24 |
| MH0083   | 139,100 | 674 | 56,663 | 40.74 | 82,437  | 59.26 |
| MH0084   | 65,841  | 657 | 25,706 | 39.04 | 40,135  | 60.96 |
| MH0085   | 103,668 | 721 | 45,313 | 43.71 | 58,355  | 56.29 |
| MH0086   | 189,088 | 685 | 79,299 | 41.94 | 109,789 | 58.06 |
| O2.UC-1  | 96,512  | 623 | 34,228 | 35.47 | 62,284  | 64.53 |
| O2.UC-11 | 71,353  | 600 | 25,604 | 35.88 | 45,749  | 64.12 |
| O2.UC-12 | 98,964  | 654 | 40,906 | 41.33 | 58,058  | 58.67 |
| O2.UC-13 | 120,394 | 681 | 53,386 | 44.34 | 67,008  | 55.66 |
| O2.UC-14 | 54,131  | 627 | 21,850 | 40.37 | 32,281  | 59.63 |
| O2.UC-16 | 46,037  | 629 | 16,064 | 34.89 | 29,973  | 65.11 |
| O2.UC-17 | 57,242  | 612 | 18,924 | 33.06 | 38,318  | 66.94 |
| O2.UC-18 | 89,842  | 713 | 43,701 | 48.64 | 46,141  | 51.36 |
| O2.UC-19 | 119,324 | 674 | 47,238 | 39.59 | 72,086  | 60.41 |
| O2.UC-20 | 111,230 | 652 | 40,383 | 36.31 | 70,847  | 63.69 |
| O2.UC-21 | 67,129  | 618 | 20,422 | 30.42 | 46,707  | 69.58 |
| O2.UC-22 | 129,995 | 669 | 48,544 | 37.34 | 81,451  | 62.66 |
| O2.UC-23 | 88,756  | 655 | 32,357 | 36.46 | 56,399  | 63.54 |
| O2.UC-24 | 98,619  | 672 | 40,044 | 40.60 | 58,575  | 59.40 |
| O2.UC-4  | 110,442 | 653 | 44,431 | 40.23 | 66,011  | 59.77 |
| V1.CD-1  | 66,424  | 713 | 29,247 | 44.03 | 37,177  | 55.97 |
| V1.CD-11 | 103,511 | 700 | 50,067 | 48.37 | 53,444  | 51.63 |
| V1.CD-12 | 76,160  | 671 | 29,483 | 38.71 | 46,677  | 61.29 |
| V1.CD-13 | 131,976 | 661 | 53,521 | 40.55 | 78,455  | 59.45 |
| V1.CD-14 | 152,955 | 662 | 59,530 | 38.92 | 93,425  | 61.08 |
| V1.CD-15 | 67,076  | 728 | 30,003 | 44.73 | 37,073  | 55.27 |
| V1.CD-2  | 24,797  | 347 | 7,562  | 30.50 | 17,235  | 69.50 |
| V1.CD-3  | 98,039  | 664 | 37,143 | 37.89 | 60,896  | 62.11 |
| V1.CD-4  | 132,437 | 665 | 51,773 | 39.09 | 80,664  | 60.91 |
| V1.CD-6  | 101,507 | 656 | 37,491 | 36.93 | 64,016  | 63.07 |
| V1.CD-8  | 154,183 | 659 | 59,856 | 38.82 | 94,327  | 61.18 |
| V1.CD-9  | 121,137 | 709 | 57,170 | 47.19 | 63,967  | 52.81 |
| V1.UC-10 | 145,180 | 679 | 58,711 | 40.44 | 86,469  | 59.56 |
| V1.UC-13 | 114,043 | 720 | 48,733 | 42.73 | 65,310  | 57.27 |
| V1.UC-14 | 128,427 | 665 | 54,155 | 42.17 | 74,272  | 57.83 |
| V1.UC-15 | 129,972 | 693 | 56,686 | 43.61 | 73,286  | 56.39 |
| V1.UC-17 | 102,865 | 668 | 40,669 | 39.54 | 62,196  | 60.46 |
| V1.UC-18 | 117,084 | 697 | 49,826 | 42.56 | 67,258  | 57.44 |
| V1.UC-19 | 143,362 | 689 | 63,221 | 44.10 | 80,141  | 55.90 |
| V1.UC-21 | 116,580 | 669 | 47,051 | 40.36 | 69,529  | 59.64 |
| V1.UC-6  | 168,200 | 648 | 58,195 | 34.60 | 110,005 | 65.40 |
| V1.UC-7  | 68,798  | 725 | 28,091 | 40.83 | 40,707  | 59.17 |

|                |                   |            |                  |              |                  |              |
|----------------|-------------------|------------|------------------|--------------|------------------|--------------|
| V1.UC-8        | 159,651           | 660        | 64,601           | 40.46        | 95,050           | 59.54        |
| V1.UC-9        | 136,210           | 634        | 49,492           | 36.34        | 86,718           | 63.66        |
| Mixed assembly | 598,853           | 537        | 114,955          | 19.20        | 483,898          | 80.80        |
| <b>Sum</b>     | <b>14,048,045</b> | <b>661</b> | <b>5,465,716</b> | <b>38.91</b> | <b>8,582,329</b> | <b>61.09</b> |

**Table 7 | Non-redundant genes.** Genes were compared at 95 % identity cut-off. Those that were overlapped over 90% length were considered redundant and removed. Common and rare genes were present in >50% and < 20% of individuals, respectively.

|                        | <b># of genes</b> | <b>Total length (bp)</b> | <b>Mean length (bp)</b> |
|------------------------|-------------------|--------------------------|-------------------------|
| Non-redundant gene set | 3,299,822         | 2,323,171,095            | 704.03                  |
| Common                 | 294,110           | 292,960,308              | 996.09                  |
| Rare                   | 2,375,655         | 1,510,527,924            | 635.84                  |

**Table 8 | Common species in human gut.** 75 non-redundant species with >1% genome coverage by Illumina reads in > 50 % of the cohort individuals.

| Species                                                         | Number of individuals |                      |
|-----------------------------------------------------------------|-----------------------|----------------------|
|                                                                 | Genome coverage >1%   | Genome coverage >10% |
| <i>Faecalibacterium prausnitzii</i> SL3 3                       | 124                   | 121                  |
| <i>Roseburia intestinalis</i> M50 1                             | 124                   | 120                  |
| <i>Dorea formicigenerans</i>                                    | 123                   | 118                  |
| <i>Bacteroides vulgatus</i> ATCC 8482                           | 124                   | 117                  |
| <i>Clostridium</i> sp SS2-1                                     | 121                   | 117                  |
| <i>Bacteroides uniformis</i>                                    | 123                   | 116                  |
| <i>Eubacterium hallii</i>                                       | 122                   | 116                  |
| <i>Bacteroides</i> sp. 9_1_42FAA                                | 124                   | 115                  |
| unknown sp SS3 4                                                | 123                   | 115                  |
| <i>Coprococcus comes</i> SL7 1                                  | 124                   | 114                  |
| <i>Eubacterium rectale</i> M104 1                               | 123                   | 114                  |
| <i>Ruminococcus</i> sp SR1 5                                    | 124                   | 114                  |
| <i>Dorea longicatena</i>                                        | 123                   | 113                  |
| <i>Bacteriodes xylanisolvans</i> XB1A                           | 124                   | 111                  |
| <i>Bacteroides</i> sp. 2_1_7                                    | 124                   | 111                  |
| <i>Bacteroides</i> sp. 2_2_4                                    | 124                   | 110                  |
| <i>Ruminococcus torques</i> L2-14                               | 124                   | 110                  |
| <i>Bacteroides</i> sp. 4_3_47FAA                                | 123                   | 108                  |
| <i>Alistipes putredinis</i>                                     | 123                   | 106                  |
| <i>Collinsella aerofaciens</i>                                  | 113                   | 104                  |
| <i>Parabacteroides distasonis</i> ATCC 8503                     | 123                   | 103                  |
| <i>Eubacterium siraeum</i> 70 3                                 | 119                   | 101                  |
| <i>Bacteroides ovatus</i>                                       | 123                   | 99                   |
| <i>Bacteroides</i> sp. D4                                       | 124                   | 99                   |
| <i>Bacteroides</i> sp. D1                                       | 123                   | 98                   |
| <i>Bacteroides thetaiotaomicron</i> VPI-5482                    | 123                   | 98                   |
| <i>Bacteroides dorei</i>                                        | 124                   | 95                   |
| <i>Parabacteroides merdae</i>                                   | 116                   | 91                   |
| <i>Bifidobacterium longum</i> subsp. <i>infantis</i> CCUG 52486 | 103                   | 88                   |
| <i>Ruminococcus obeum</i> A2-162                                | 124                   | 88                   |
| <i>Bifidobacterium adolescentis</i>                             | 98                    | 86                   |
| <i>Bacteroides caccae</i>                                       | 120                   | 80                   |
| <i>Ruminococcus bromii</i> L2-63                                | 119                   | 79                   |
| <i>Ruminococcus lactaris</i>                                    | 124                   | 77                   |
| <i>Eubacterium ventriosum</i>                                   | 119                   | 73                   |



|                                               |     |    |
|-----------------------------------------------|-----|----|
| <i>Coprococcus eutactus</i>                   | 118 | 57 |
| <i>Akkermansia muciniphila</i> ATCC BAA-835   | 82  | 56 |
| <i>Bacteroides stercoris</i>                  | 121 | 56 |
| <i>Bacteroides cellulosilyticus</i>           | 96  | 51 |
| <i>Bacteroides fragilis</i> 3_1_12            | 114 | 50 |
| <i>Eubacterium bifforme</i>                   | 64  | 50 |
| <i>Bacteroides eggerthii</i>                  | 122 | 48 |
| <i>Streptococcus thermophilus</i> LMD-9       | 114 | 48 |
| <i>Bacteroides capillosus</i>                 | 124 | 42 |
| <i>Holdemania filiformis</i>                  | 122 | 42 |
| <i>Clostridium leptum</i>                     | 119 | 41 |
| <i>Prevotella copri</i>                       | 69  | 41 |
| <i>Clostridium</i> sp L2-50                   | 123 | 40 |
| <i>Bacteroides plebeius</i>                   | 93  | 36 |
| <i>Butyrivibrio crossotus</i>                 | 123 | 36 |
| <i>Bacteroides coprocola</i>                  | 112 | 33 |
| <i>Bacteroides finegoldii</i>                 | 124 | 32 |
| <i>Clostridium bartlettii</i>                 | 83  | 32 |
| <i>Clostridium</i> sp M62 1                   | 124 | 31 |
| <i>Escherichia coli</i> O157:H7 str. EC4115   | 68  | 31 |
| <i>Parabacteroides johnsonii</i>              | 119 | 31 |
| <i>Subdoligranulum variabile</i>              | 123 | 31 |
| <i>Bacteroides intestinalis</i>               | 116 | 27 |
| <i>Catenibacterium mitsuokai</i>              | 65  | 26 |
| <i>Clostridium bolteae</i>                    | 104 | 26 |
| <i>Bifidobacterium pseudocatenulatum</i>      | 65  | 24 |
| <i>Anaerotruncus colihominis</i>              | 123 | 20 |
| <i>Bifidobacterium catenulatum</i>            | 75  | 18 |
| <i>Ruminococcus gnavus</i>                    | 123 | 18 |
| <i>Bacteroides coprophilus</i>                | 111 | 15 |
| <i>Bacteroides pectinophilus</i>              | 122 | 13 |
| <i>Gordonibacter pamelaiae</i> gen nov sp Nov | 89  | 13 |
| <i>Clostridium asparagiforme</i>              | 118 | 10 |
| <i>Clostridium nexile</i>                     | 124 | 9  |
| <i>Blautia hansenii</i>                       | 116 | 5  |
| <i>Clostridium scindens</i>                   | 113 | 5  |
| <i>Enterococcus faecalis</i> TX0104           | 114 | 3  |
| <i>Mollicutes bacterium</i> D7                | 74  | 3  |
| <i>Bryantella formatexigens</i>               | 78  | 1  |
| <i>Clostridium methylpentosum</i>             | 103 | 1  |

**Table 9 | Number of genes classified.** The predicted genes were aligned to the known microbial genes, the genes in KEGG orthology database and in COG database. Blastp software was used to align genes with E-value  $<1E-5$ , and the best hit was selected. LCA-based algorithm was used to assign gene sequences to taxa. When a gene was conserved in many species, it was assigned to the lowest common ancestor (LCA). However, if the LCA is at phylum-level or below, it was considered to be “Classified” all the same. If not, it was treated as “Unclassified”.

|                       |              | <b>Common genes</b> | <b>Rare genes</b> | <b>All genes</b> |
|-----------------------|--------------|---------------------|-------------------|------------------|
| <b>Total</b>          |              | <b>294,110</b>      | <b>2,375,655</b>  | <b>3,299,822</b> |
| <b>Phylotype</b>      | Unknown      | 5.99%               | 27.64%            | 22.93%           |
|                       | Unclassified | 4.31%               | 3.82%             | 3.88%            |
|                       | Classified   | 89.70%              | 68.54%            | 73.19%           |
| <b>eggNOG</b>         | Unannotated  | 23.88%              | 47.36%            | 42.46%           |
|                       | Annotated    | 76.12%              | 52.64%            | 57.54%           |
| <b>COG</b>            | Unannotated  | 31.63%              | 54.89%            | 49.99%           |
|                       | Annotated    | 68.37%              | 45.11%            | 50.01%           |
| <b>KEGG Orthology</b> | Unannotated  | 34.73%              | 57.84%            | 52.97%           |
|                       | Annotated    | 65.27%              | 42.16%            | 47.03%           |
| <b>KEGG Pathway</b>   | Unannotated  | 73.81%              | 83.19%            | 81.26%           |
|                       | Annotated    | 26.19%              | 16.81%            | 18.74%           |

**Table 10 | Range clusters.** (TableS10\_RangeClusters.xls)

**Table 11 | Functions present in the human metagenome and genome.**  
(TableS11\_Genome&metagenome.xls)

Table 12 | 89 frequent microbial species/strains in human gut.

| Species/strain                               | Source  |
|----------------------------------------------|---------|
| <i>Methanobrevibacter smithii</i> F1         | HMP     |
| <i>Methanobrevibacter smithii</i> ATCC 35061 | GenBank |
| <i>Methanobrevibacter smithii</i>            | HMP     |
| <i>Eubacterium hallii</i>                    | HMP     |
| <i>Eubacterium siraeum</i>                   | HMP     |
| <i>Eubacterium ventriosum</i>                | HMP     |
| <i>Mitsuokella multacida</i>                 | HMP     |
| <i>Acidaminococcus</i> sp. D21               | HMP     |
| <i>Ruminococcus gnavus</i>                   | HMP     |
| <i>Ruminococcus obeum</i>                    | HMP     |
| <i>Ruminococcus bromii</i>                   | MetaHIT |
| <i>Ruminococcus torques</i>                  | HMP     |
| <i>Faecalibacterium prausnitzii</i> M21/2    | HMP     |
| <i>Faecalibacterium prausnitzii</i>          | MetaHIT |
| <i>butyrate-producing bacterium</i> SR1/5    | MetaHIT |
| <i>Clostridium</i> sp. SS2/1                 | HMP     |
| <i>Clostridium</i> sp. M62/1                 | HMP     |
| <i>Roseburia intestinalis</i> L1-82          | HMP     |
| <i>Butyrivibrio crossotus</i>                | HMP     |
| <i>Coprococcus eutactus</i>                  | HMP     |
| <i>Coprococcus comes</i>                     | HMP     |
| <i>Dorea formicigenerans</i>                 | HMP     |
| <i>Dorea longicatena</i>                     | HMP     |
| <i>Enterococcus casseliflavus</i> EC10       | HMP     |
| <i>Enterococcus casseliflavus</i> EC20       | HMP     |
| <i>Enterococcus faecalis</i> D6              | HMP     |
| <i>Enterococcus gallinarum</i> EG1           | HMP     |
| <i>Enterococcus faecium</i> Com15            | HMP     |
| <i>Enterococcus faecium</i> 1,230,933        | HMP     |
| <i>Catenibacterium mitsuokai</i>             | HMP     |
| <i>Escherichia coli</i> CFT073               | GenBank |
| <i>Escherichia coli</i> S88                  | GenBank |
| <i>Escherichia coli</i> ED1a                 | GenBank |
| <i>Escherichia coli</i> HS                   | GenBank |
| <i>Escherichia coli</i> 536                  | GenBank |
| <i>Escherichia coli</i> IAI39                | GenBank |
| <i>Escherichia coli</i> SMS-3-5              | GenBank |
| <i>Escherichia coli</i> UTI89                | GenBank |

|                                                                 |         |
|-----------------------------------------------------------------|---------|
| <i>Escherichia coli</i> APEC O1                                 | GenBank |
| <i>Escherichia coli</i> O127:H6 str. E2348/69                   | GenBank |
| <i>Escherichia coli</i> ATCC 8739                               | GenBank |
| <i>Escherichia</i> sp. 3_2_53FAA                                | HMP     |
| <i>Klebsiella pneumoniae</i> 342                                | GenBank |
| <i>Klebsiella pneumoniae</i> subsp. <i>pneumoniae</i> MGH 78578 | GenBank |
| <i>Citrobacter</i> sp. 30_2                                     | HMP     |
| <i>Desulfovibrio piger</i> (ATCC 29098)                         | HMP     |
| <i>Akkermansia muciniphila</i> ATCC BAA-835                     | GenBank |
| <i>Alistipes putredinis</i>                                     | HMP     |
| <i>Bacteroides thetaiotaomicron</i> VPI-5482                    | GenBank |
| <i>Bacteroides intestinalis</i>                                 | HMP     |
| <i>Bacteroides</i> sp. D1                                       | HMP     |
| <i>Bacteroides</i> sp. 1_1_6                                    | HMP     |
| <i>Bacteroides ovatus</i>                                       | HMP     |
| <i>Bacteroides plebeius</i>                                     | HMP     |
| <i>Bacteroides</i> sp. 4_3_47FAA                                | HMP     |
| <i>Bacteroides coprocola</i>                                    | HMP     |
| <i>Bacteroides pectinophilus</i>                                | HMP     |
| <i>Bacteroides</i> sp. 2_2_4                                    | HMP     |
| <i>Bacteroides uniformis</i>                                    | HMP     |
| <i>Bacteroides coprophilus</i>                                  | HMP     |
| <i>Bacteroides</i> sp. 2_1_7                                    | HMP     |
| <i>Bacteroides cellulosilyticus</i>                             | HMP     |
| <i>Bacteroides</i> sp. 9_1_42FAA                                | HMP     |
| <i>Bacteroides fragilis</i> NCTC 9343                           | GenBank |
| <i>Bacteroides fragilis</i> YCH46                               | GenBank |
| <i>Bacteroides caccae</i>                                       | HMP     |
| <i>Bacteroides vulgatus</i> ATCC 8482                           | GenBank |
| <i>Bacteroides stercoris</i>                                    | HMP     |
| <i>Bacteroides</i> sp. 3_2_5                                    | HMP     |
| <i>Bacteroides dorei</i>                                        | HMP     |
| <i>Bacteroides</i> sp. XB1A                                     | MetaHIT |
| <i>Bacteroides eggerthii</i>                                    | HMP     |
| <i>Bacteroides</i> sp. D4                                       | HMP     |
| <i>Parabacteroides distasonis</i> ATCC 8503                     | GenBank |
| <i>Parabacteroides merdae</i>                                   | HMP     |
| <i>Prevotella copri</i>                                         | HMP     |
| <i>Bifidobacterium bifidum</i> NCIMB 41171                      | HMP     |
| <i>Bifidobacterium dentium</i>                                  | HMP     |
| <i>Bifidobacterium pseudocatenulatum</i>                        | HMP     |
| <i>Bifidobacterium animalis</i> subsp. <i>lactis</i> AD011      | GenBank |
| <i>Bifidobacterium catenulatum</i>                              | HMP     |

|                                                                 |         |
|-----------------------------------------------------------------|---------|
| <i>Bifidobacterium breve</i>                                    | HMP     |
| <i>Bifidobacterium longum</i> NCC2705                           | GenBank |
| <i>Bifidobacterium longum</i> bv. <i>infantis</i> CCUG 52486    | HMP     |
| <i>Bifidobacterium longum</i> subsp. <i>infantis</i> ATCC 15697 | GenBank |
| <i>Bifidobacterium longum</i> DJO10A                            | GenBank |
| <i>Bifidobacterium adolescentis</i> ATCC 15703                  | GenBank |
| <i>Bifidobacterium adolescentis</i> L2-32                       | HMP     |
| <i>Collinsella aerofaciens</i>                                  | HMP     |
